# Supplementary material for: Discovery of a novel hybrid coumarin-hydroxamate conjugate targeting the HDAC1-Sp1-FOSL2 signaling axis for breast cancer therapy
Source: PubMed Central journal article supplement (PMC11247895; doi:10.1186/s12964-024-01733-4), 2024-07-15

# Figure 1F

Protein marker (#26616, Thermo)

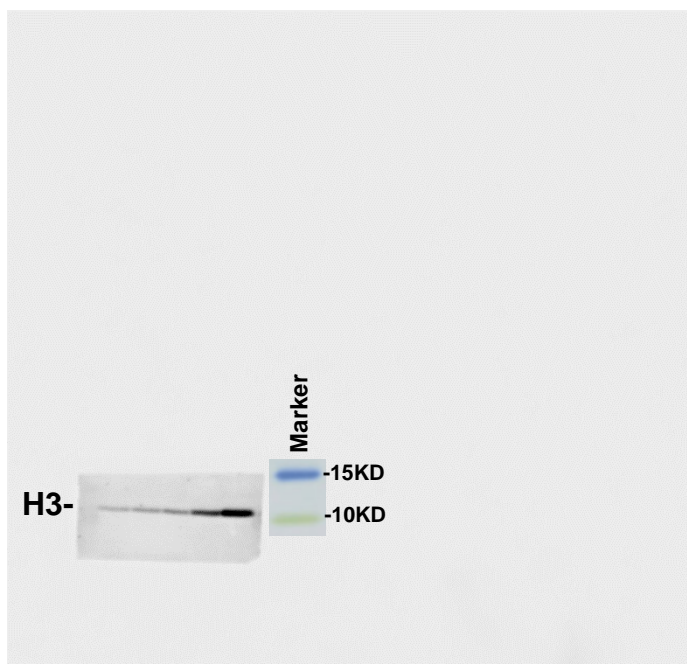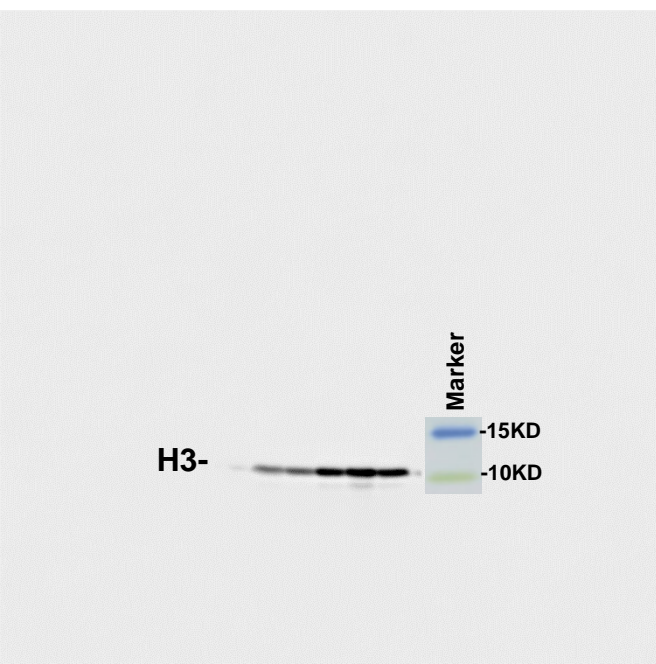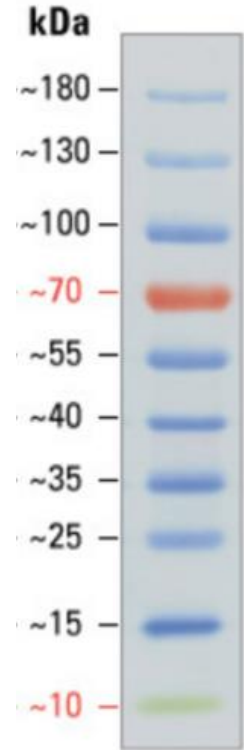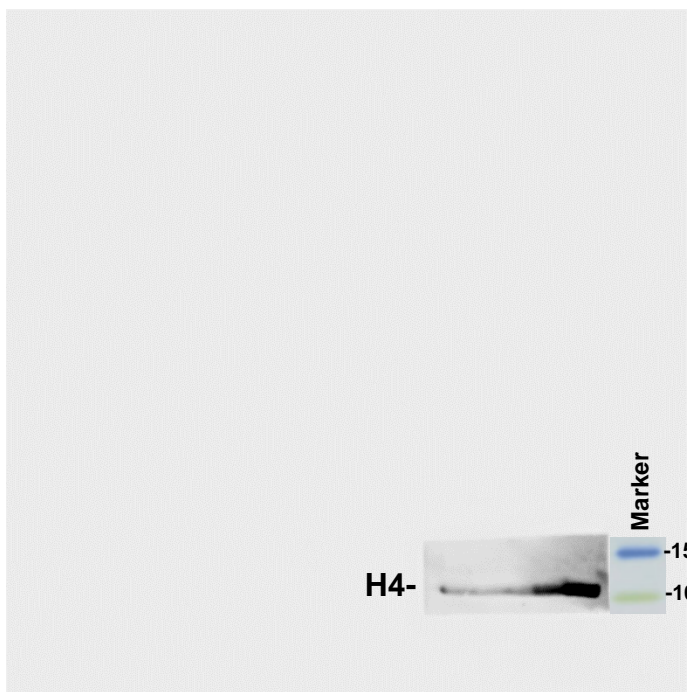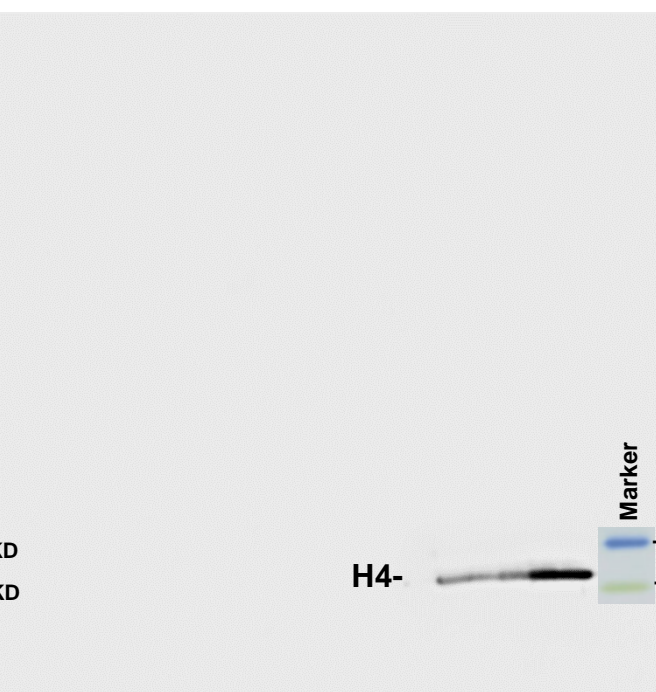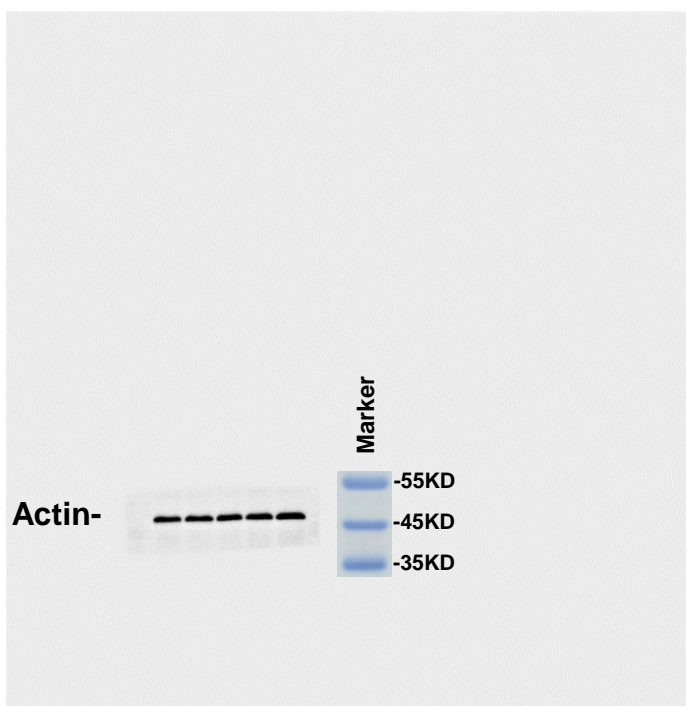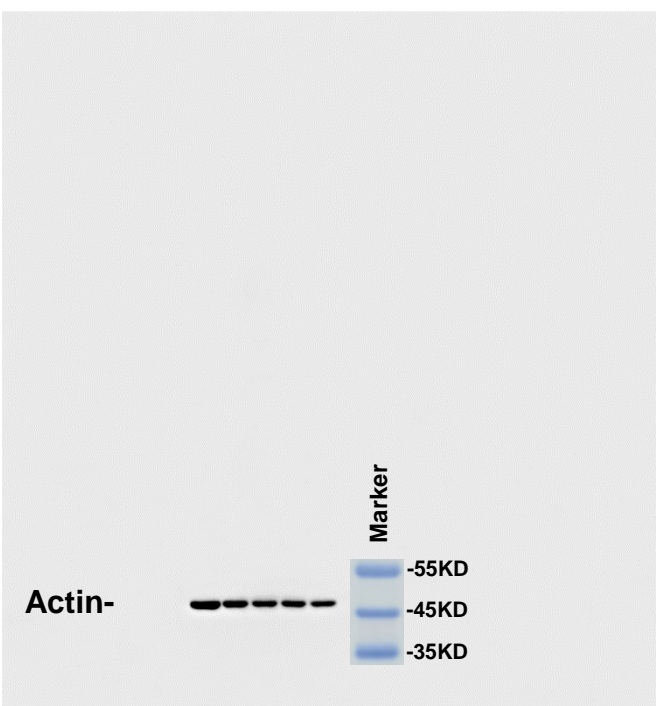

Figure 1I

Protein marker (#26616, Thermo)

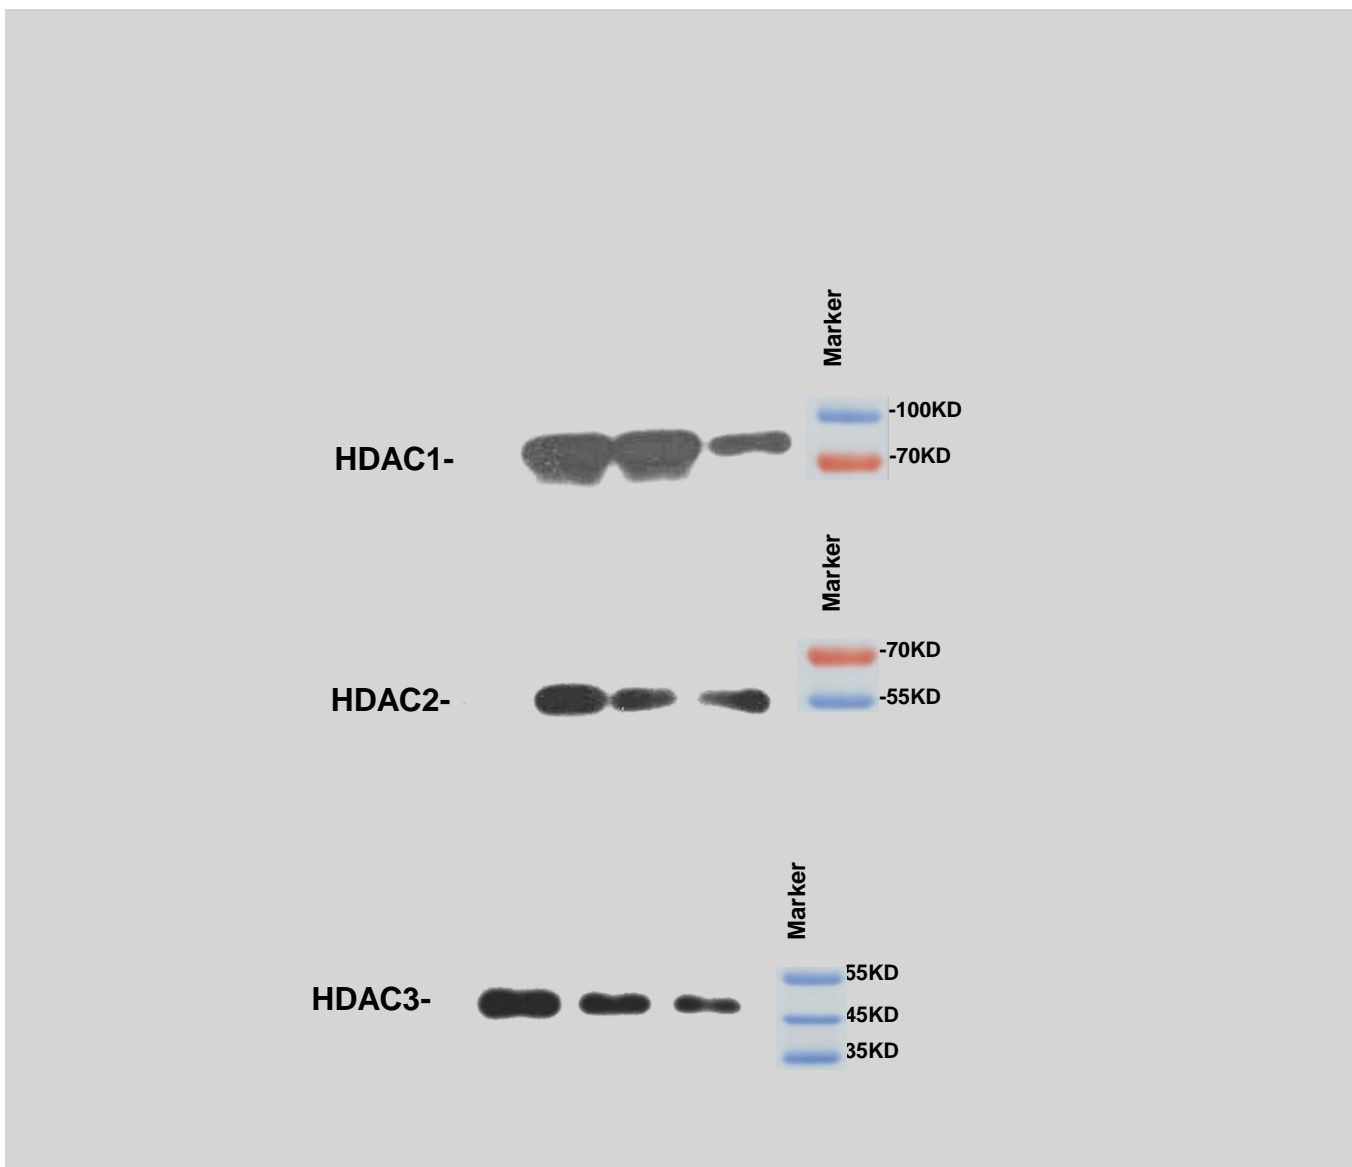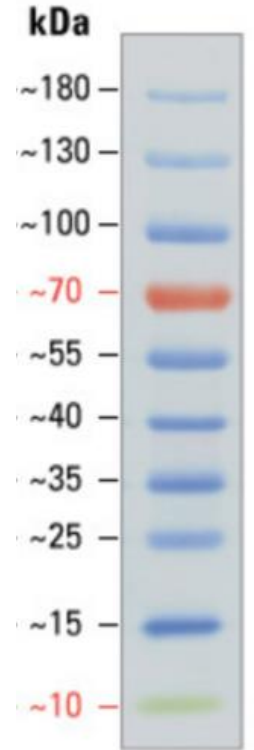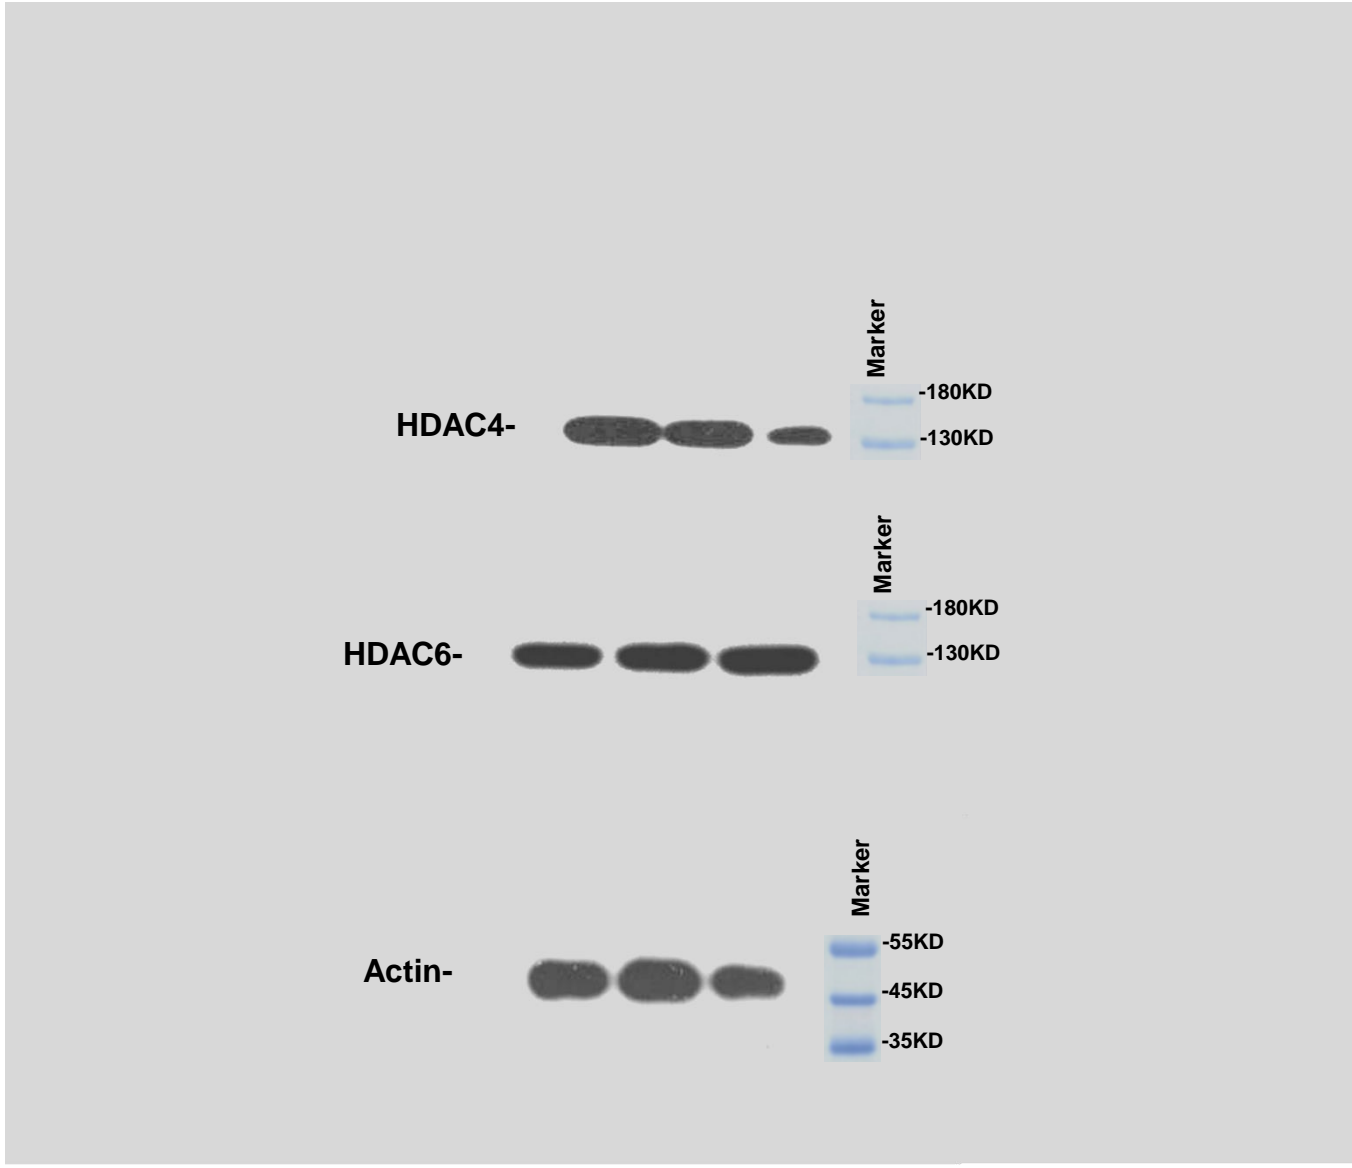

# Figure 1N

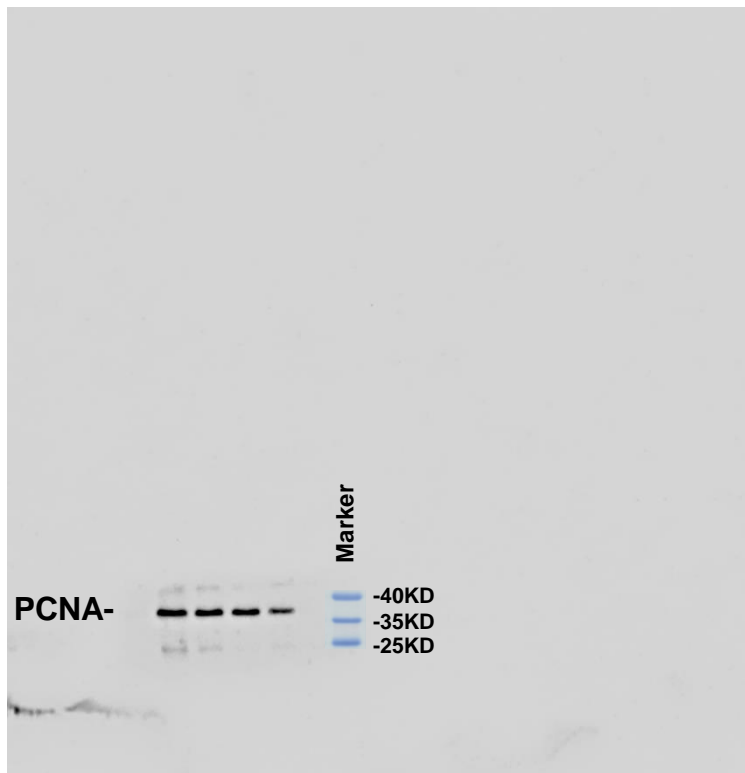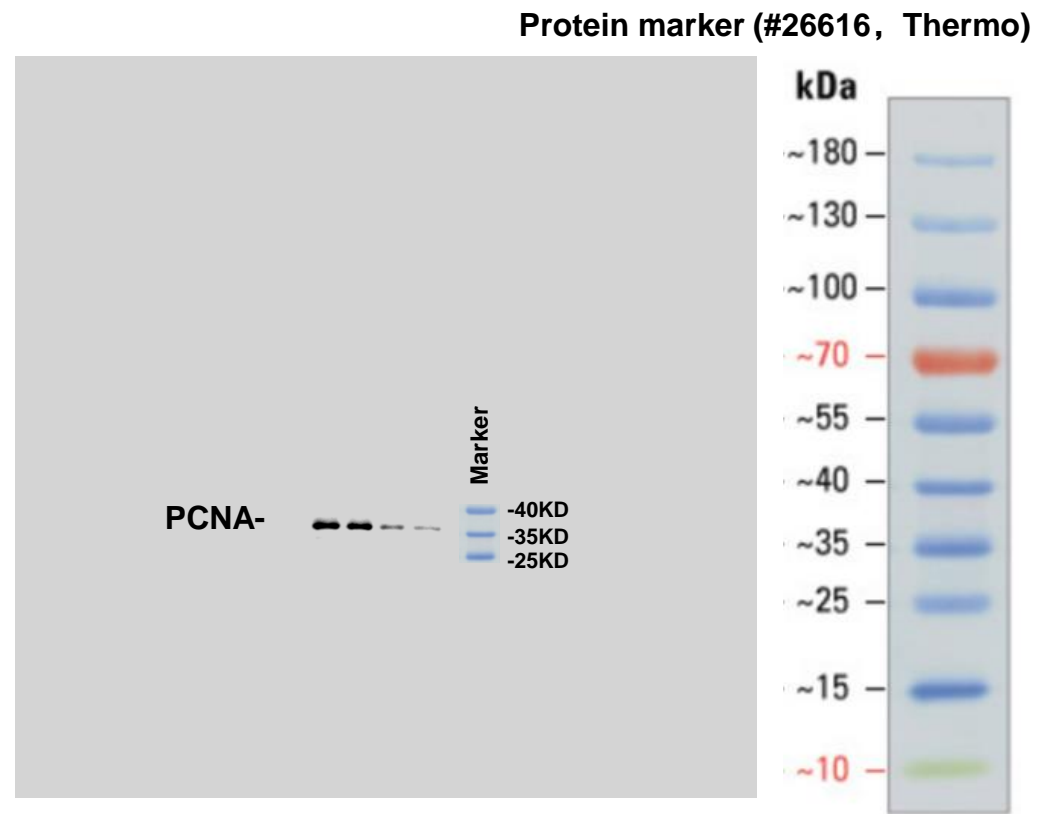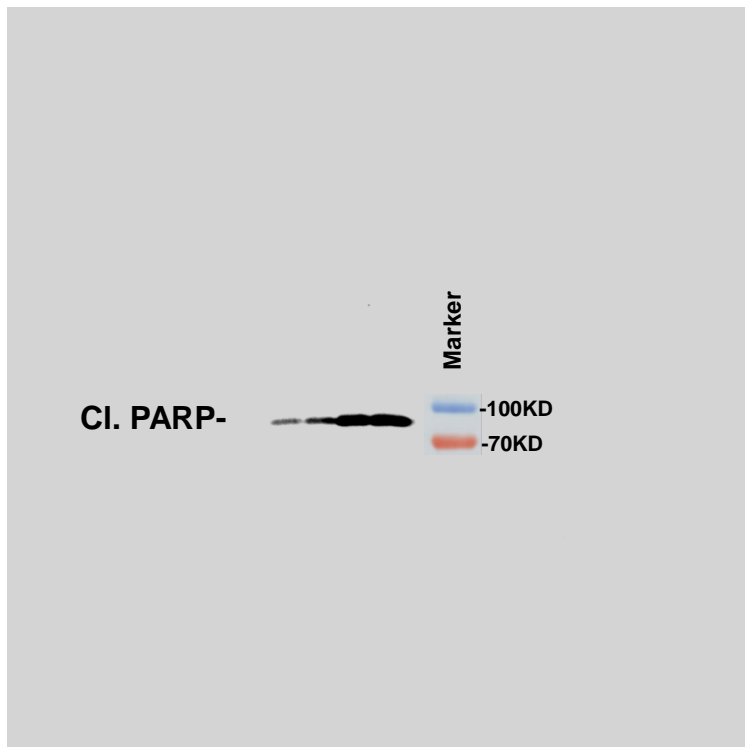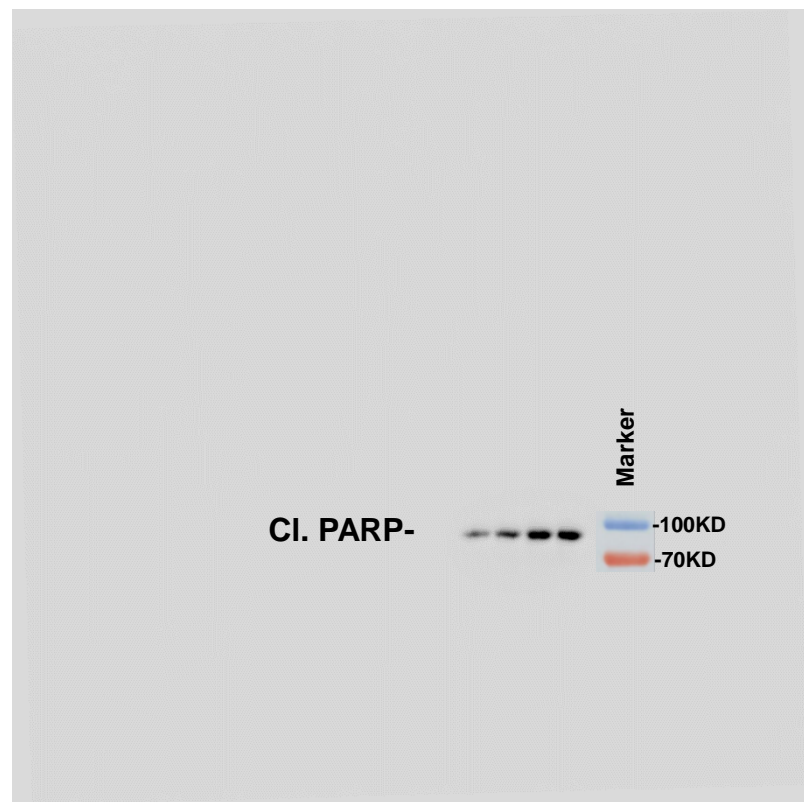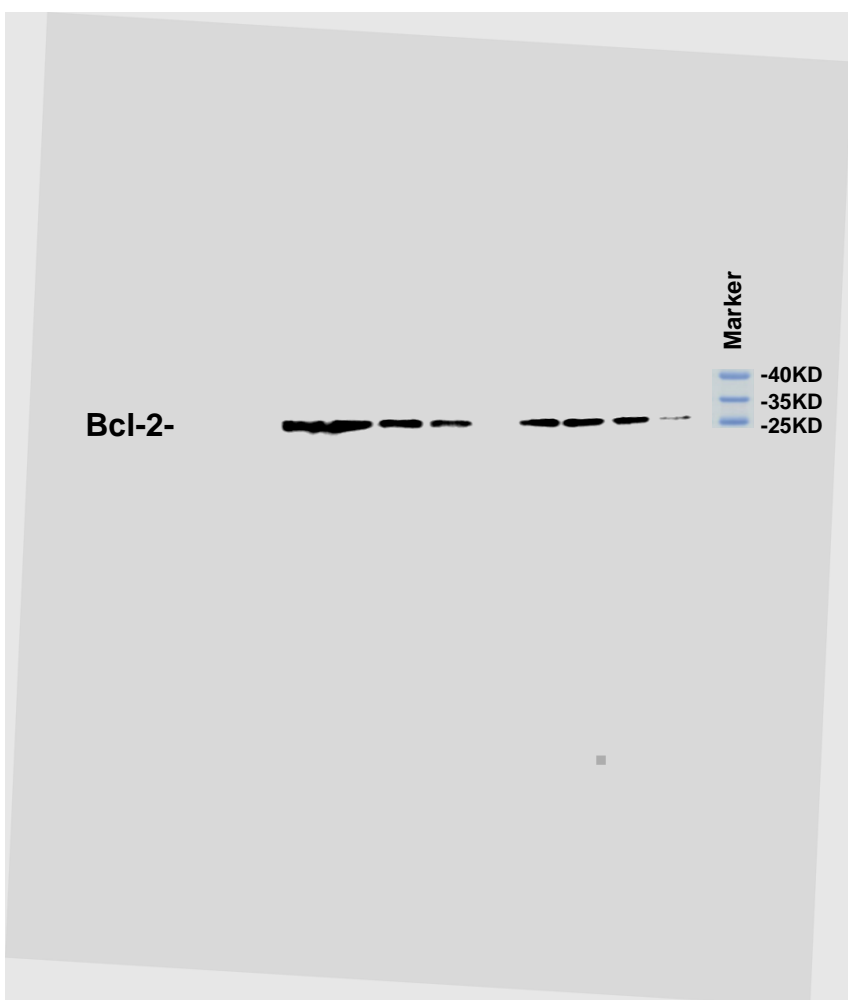

# Figure 1N

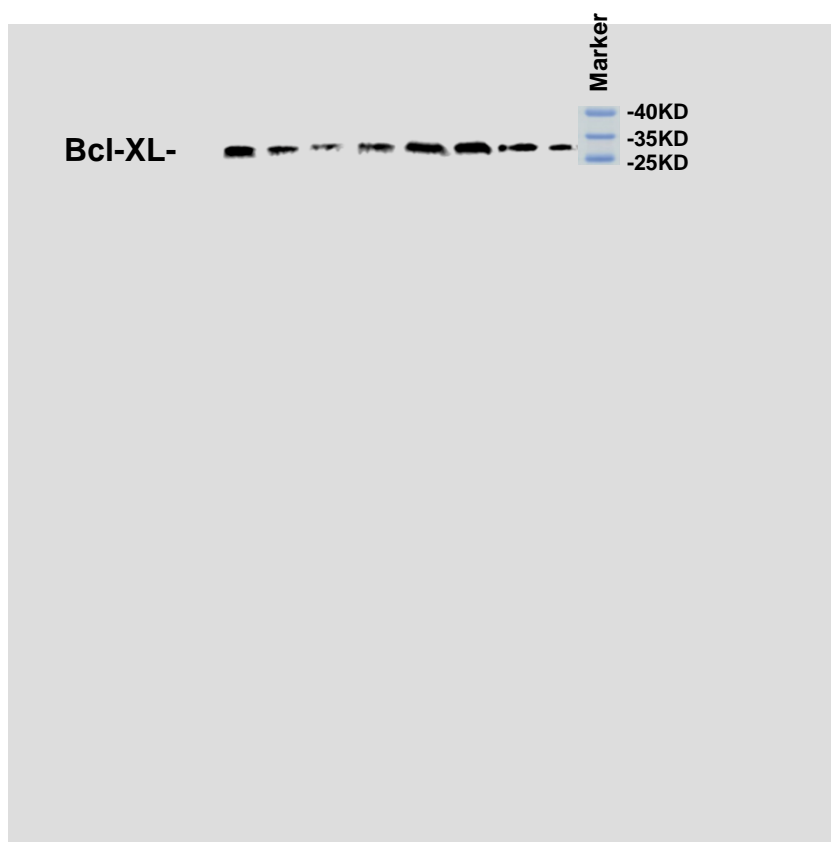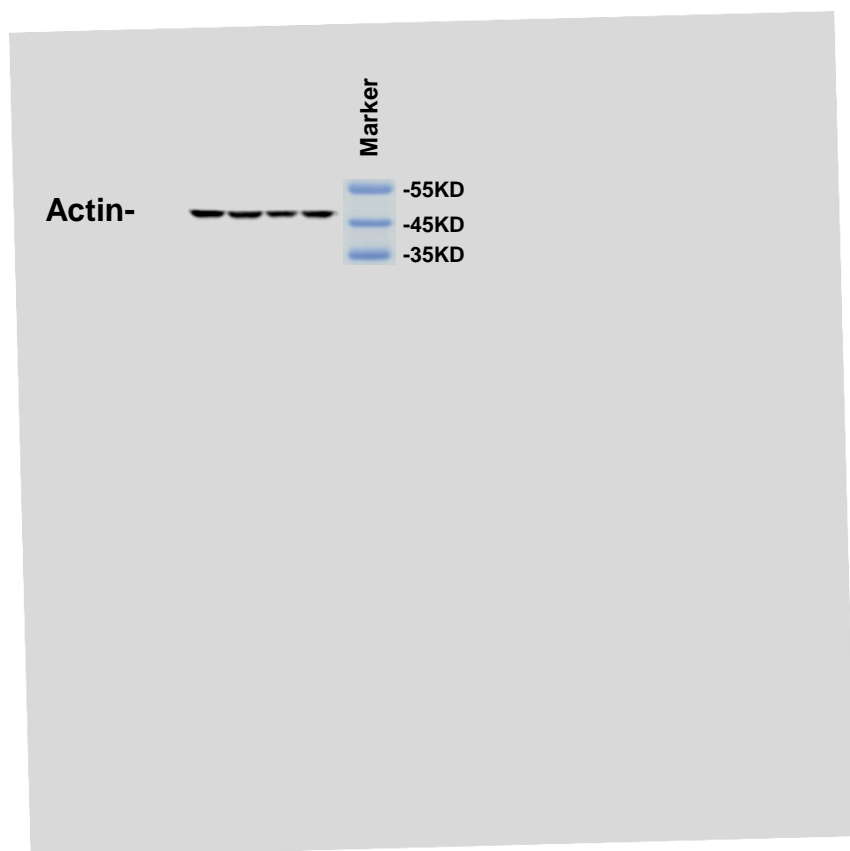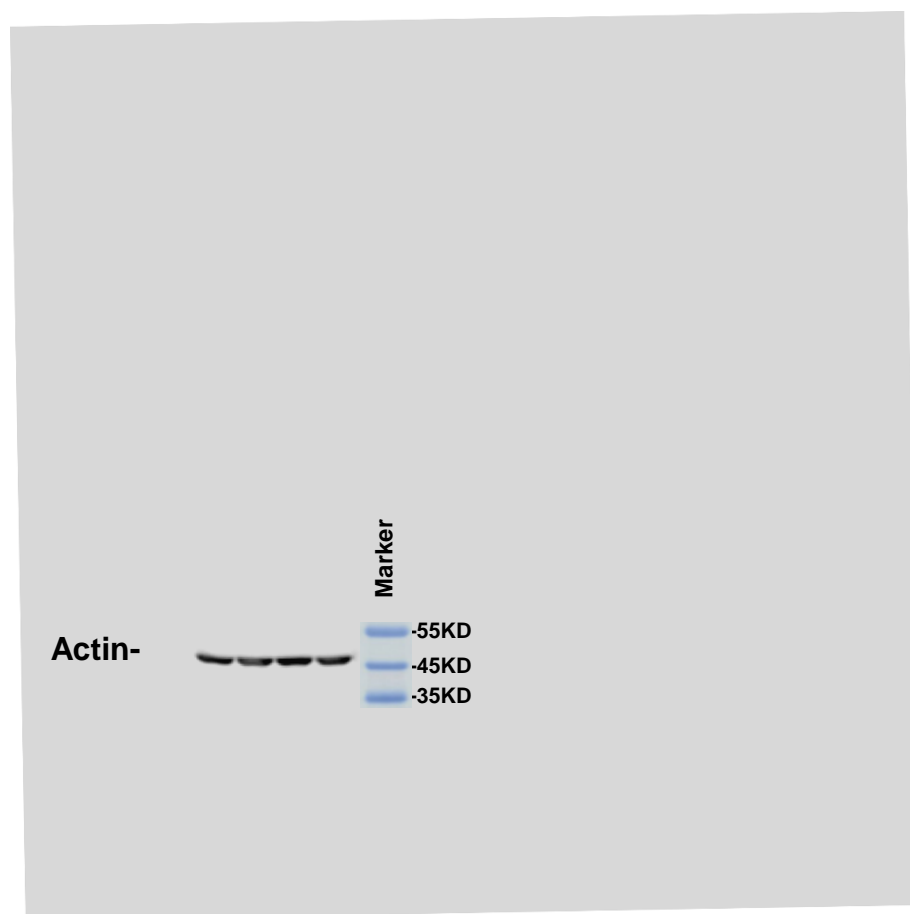

# Figure 2D

Protein marker (#26616, Thermo)

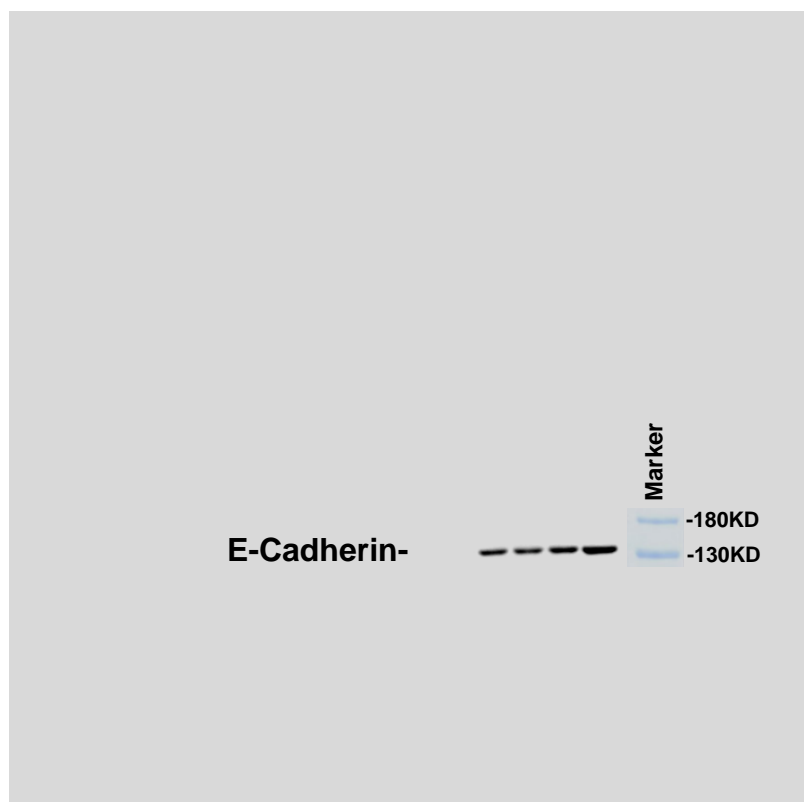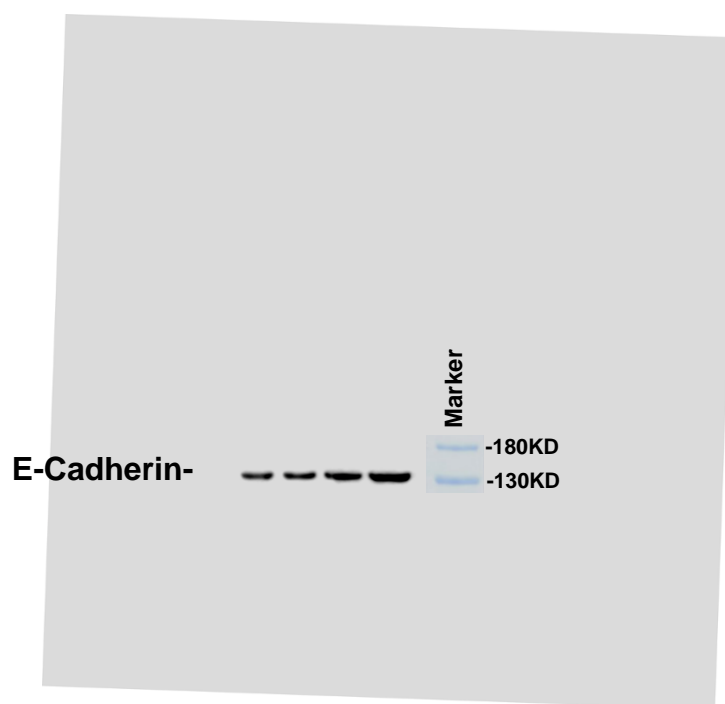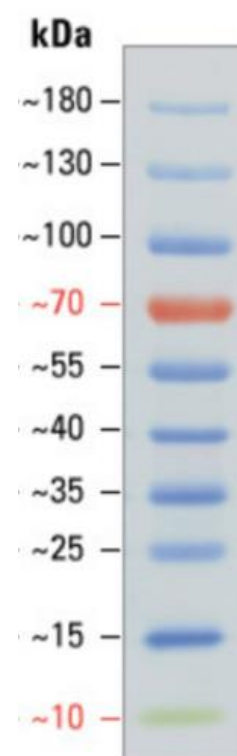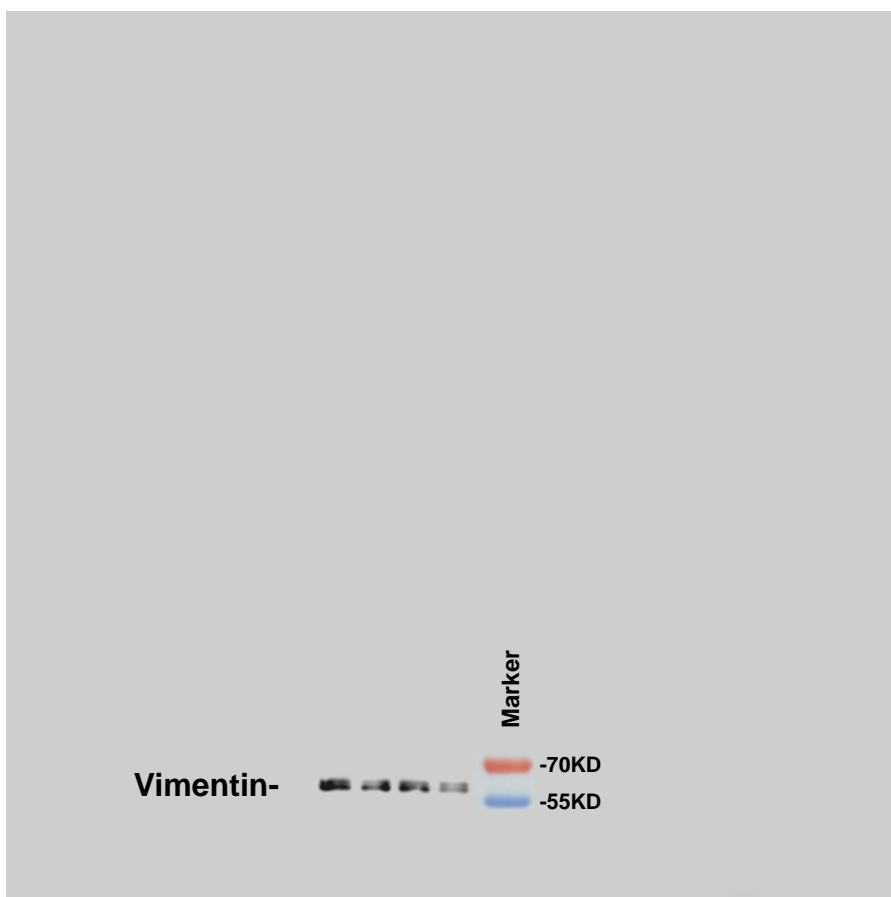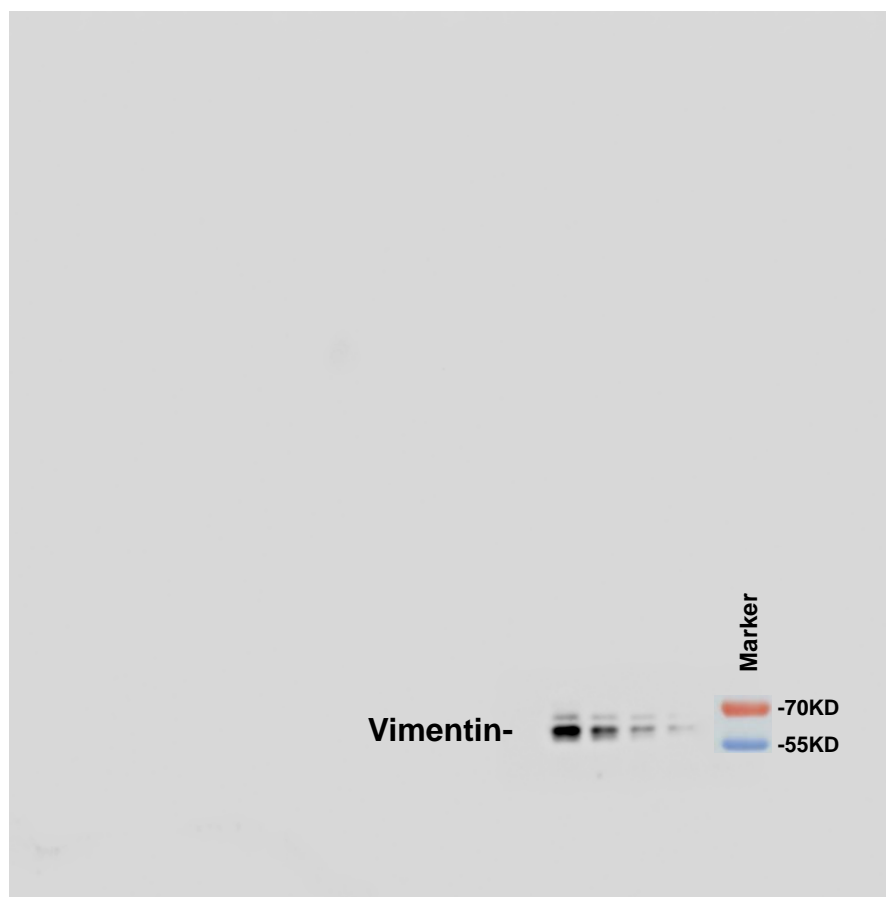

# Figure 2D

Protein marker (#26616, Thermo)

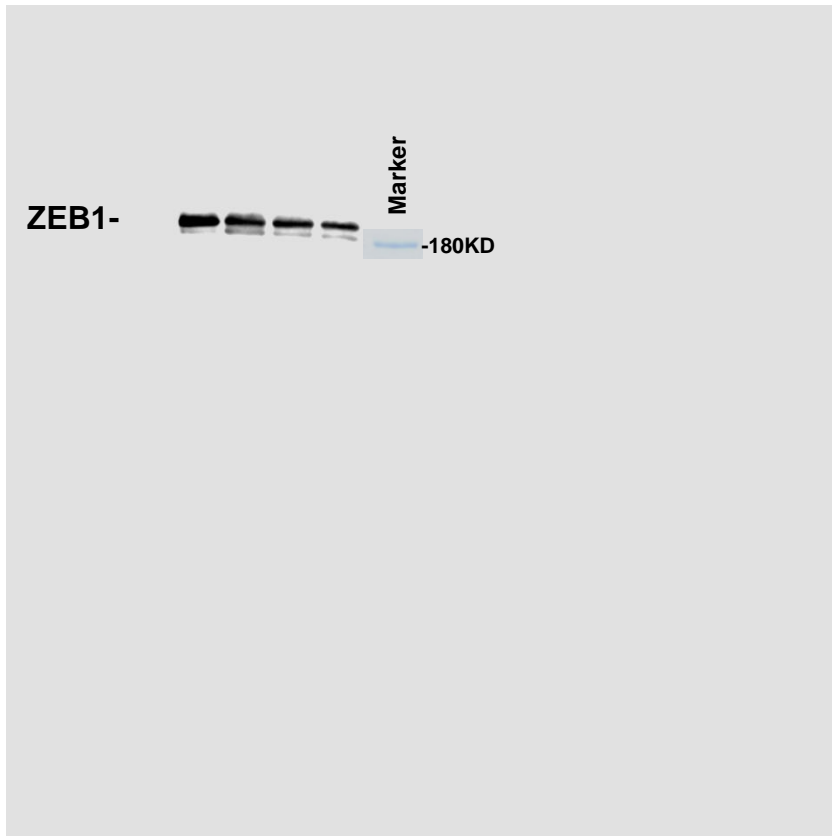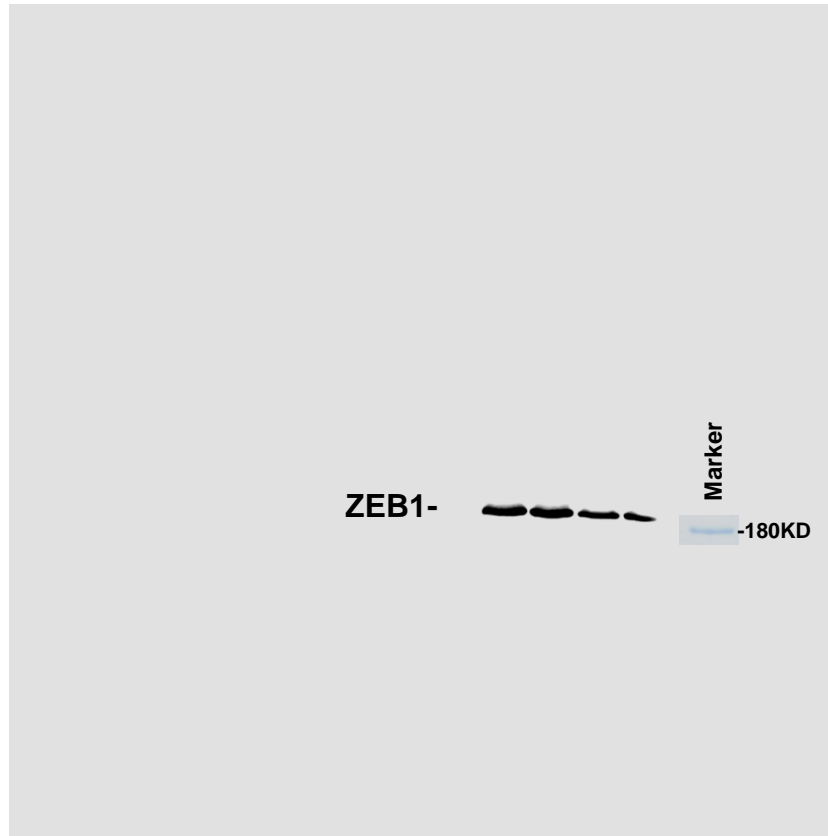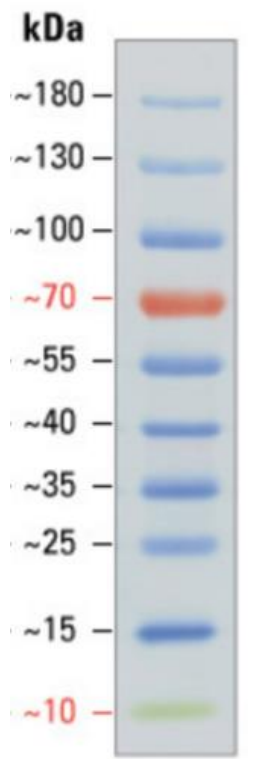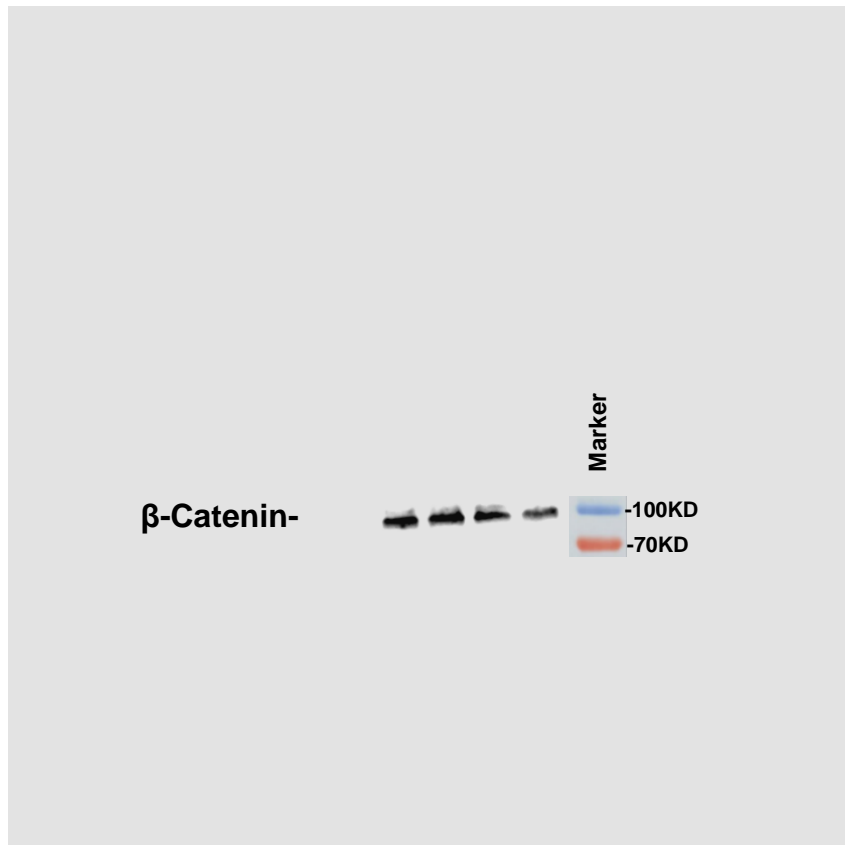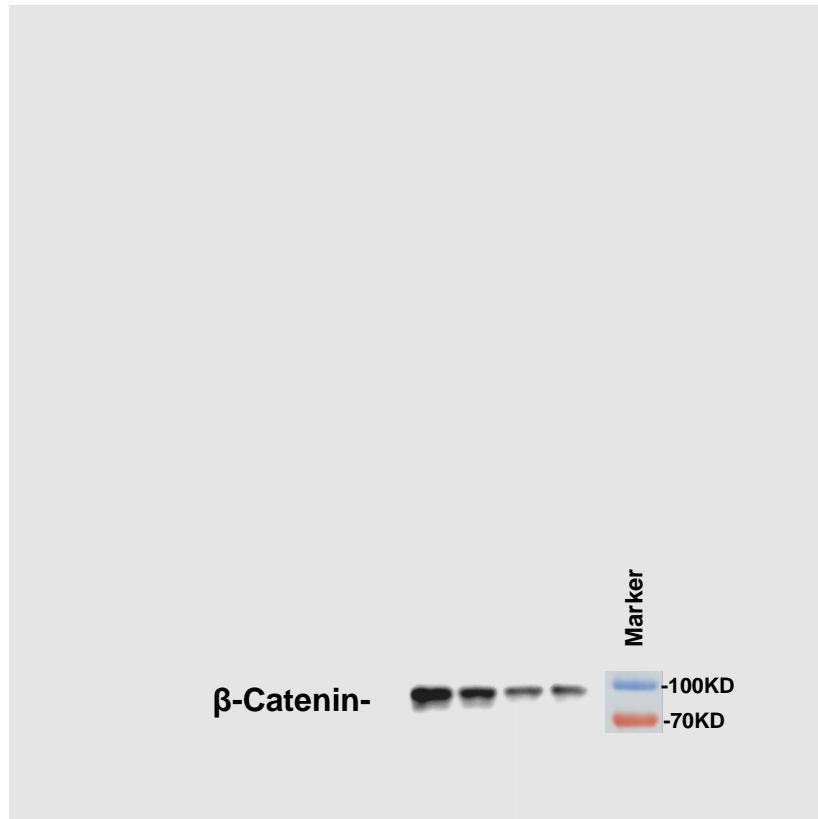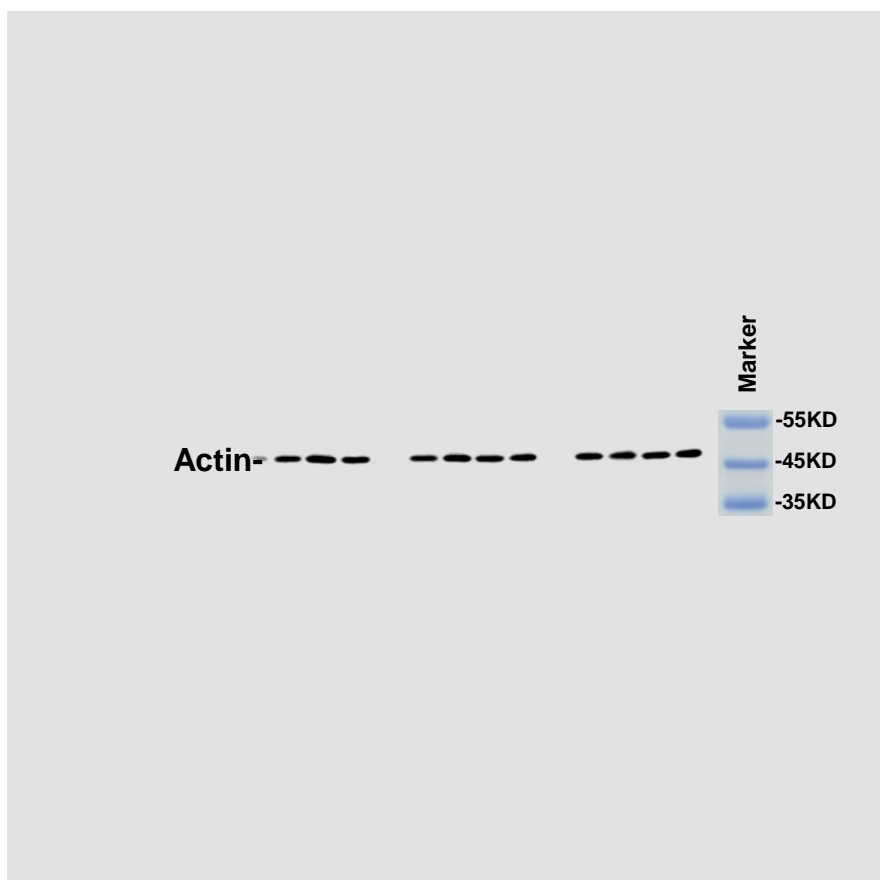

# Figure 2I

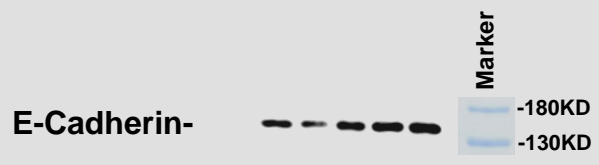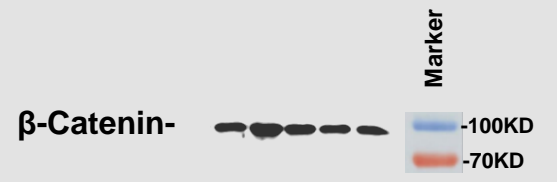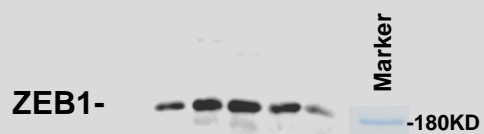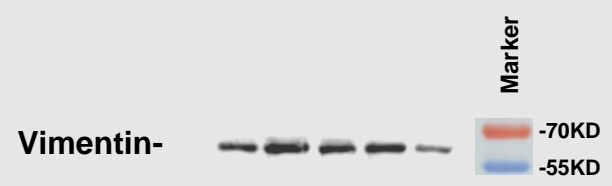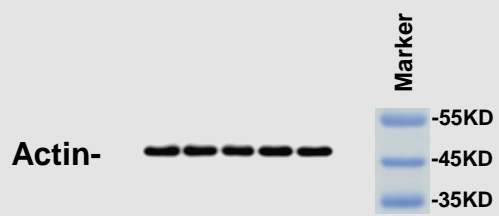



# Figure 3G

Protein marker (#26616, Thermo)

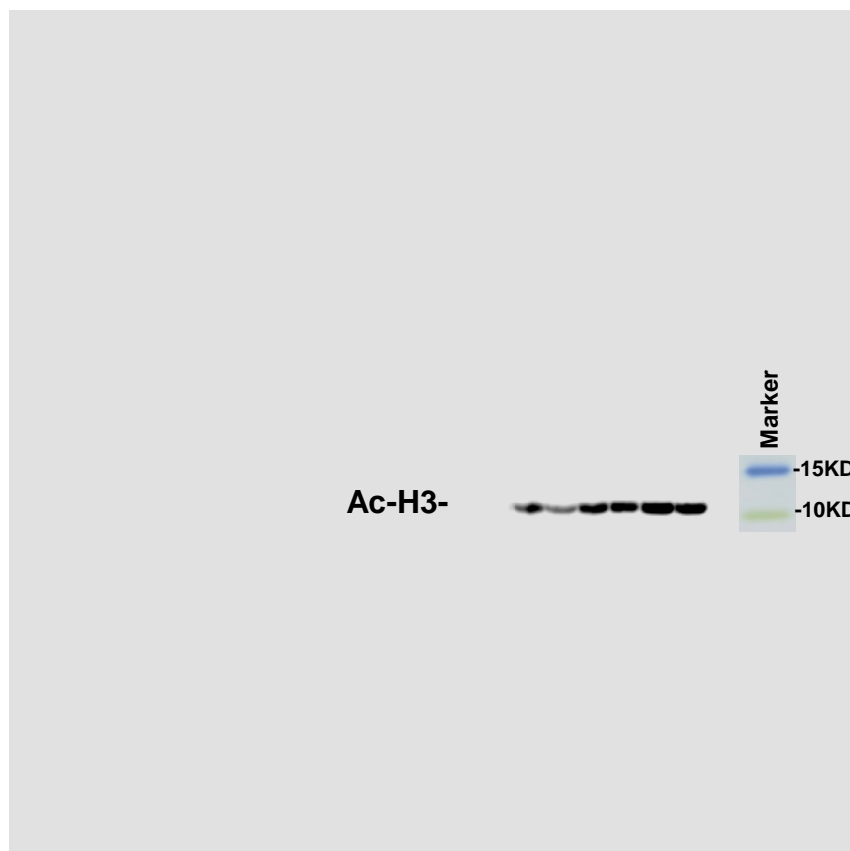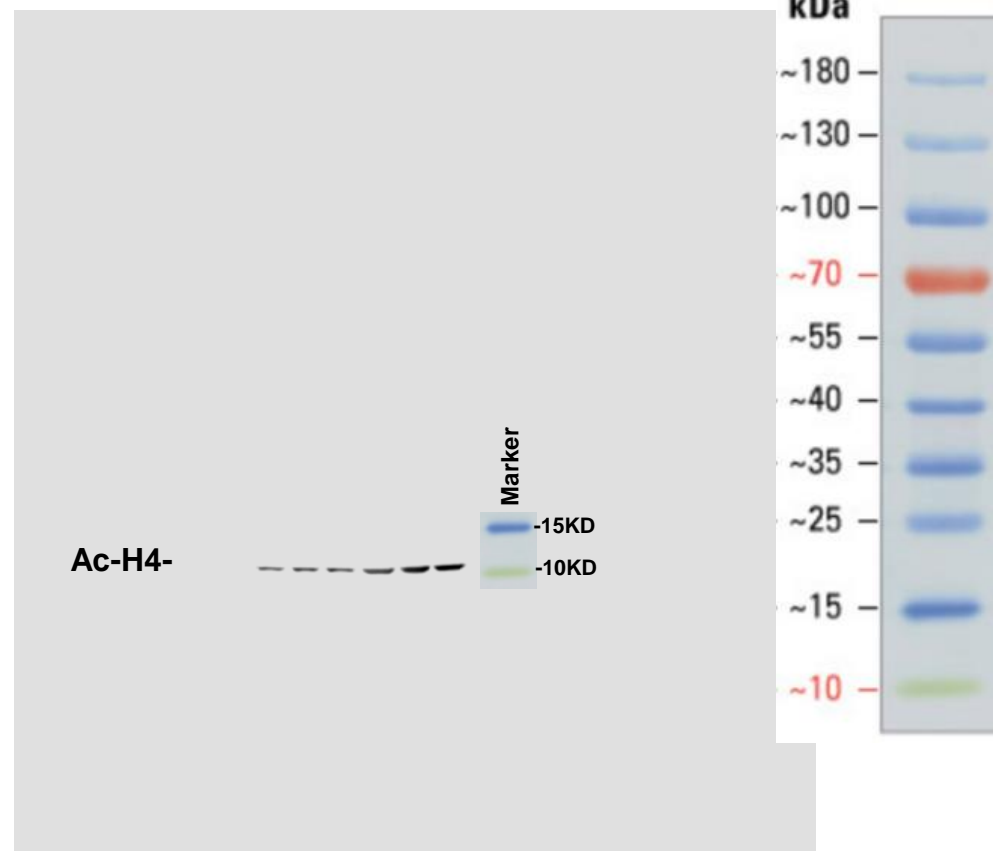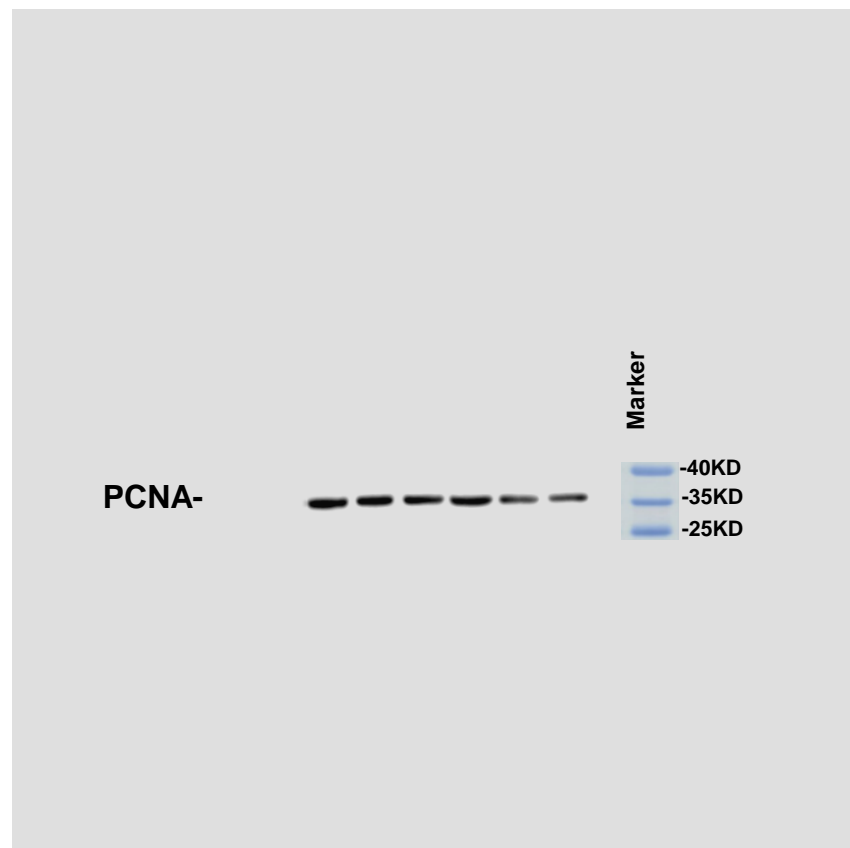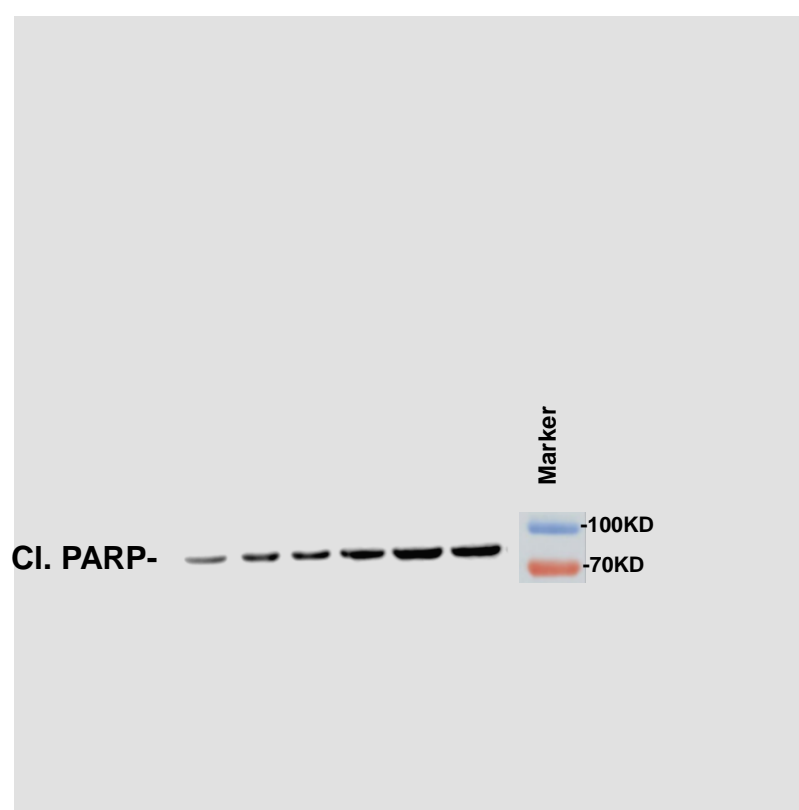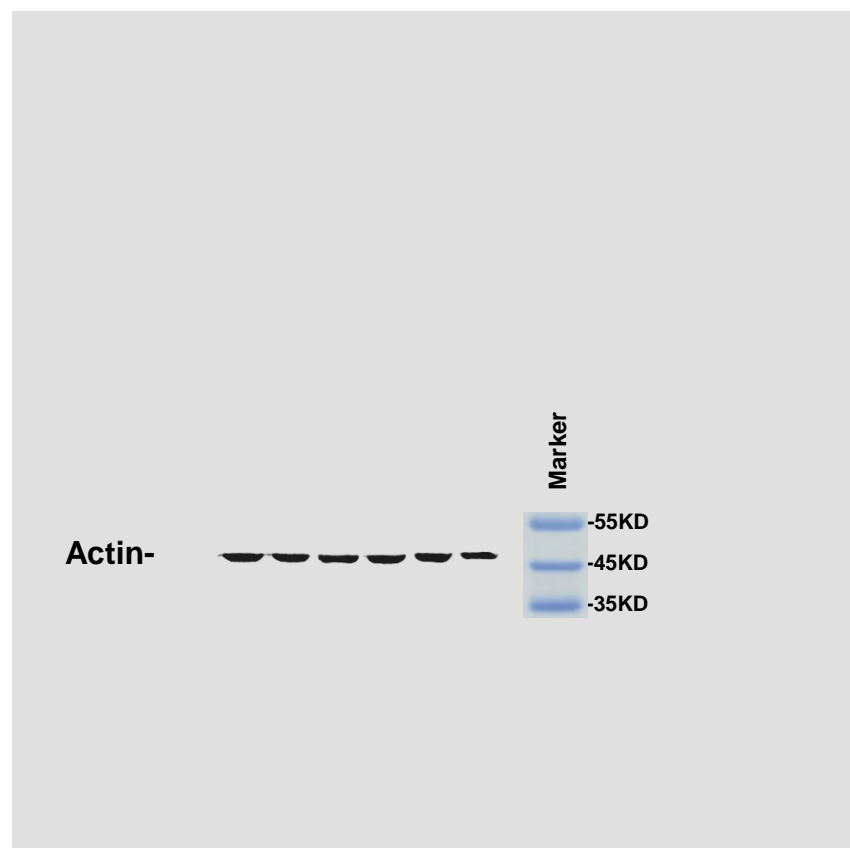



# Figure 30

Protein marker (#26616, Thermo)

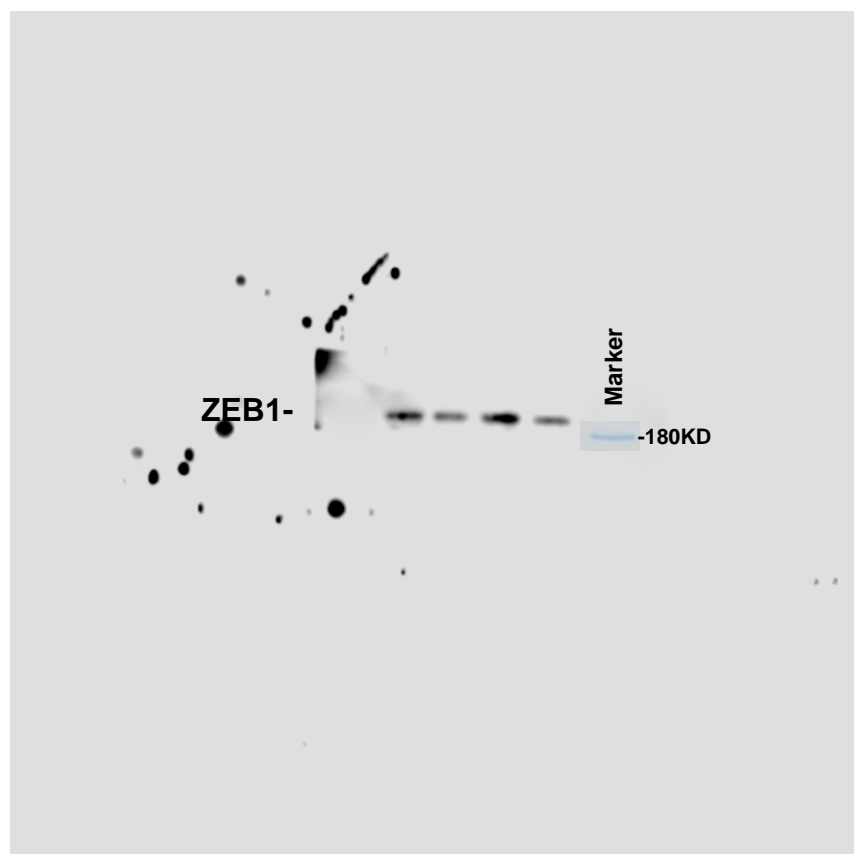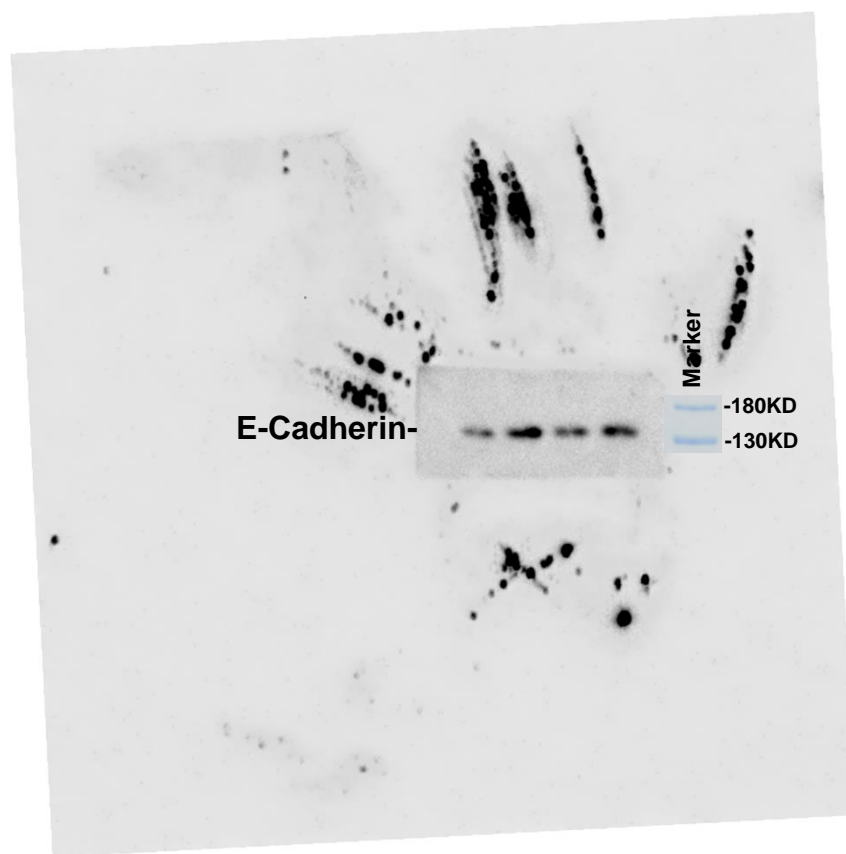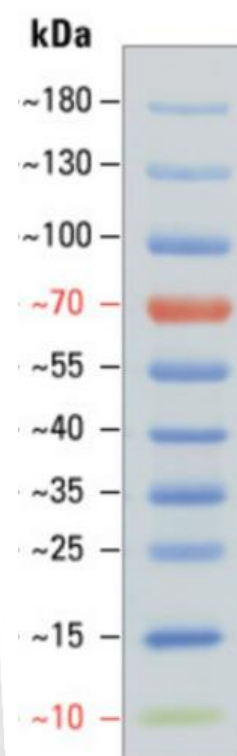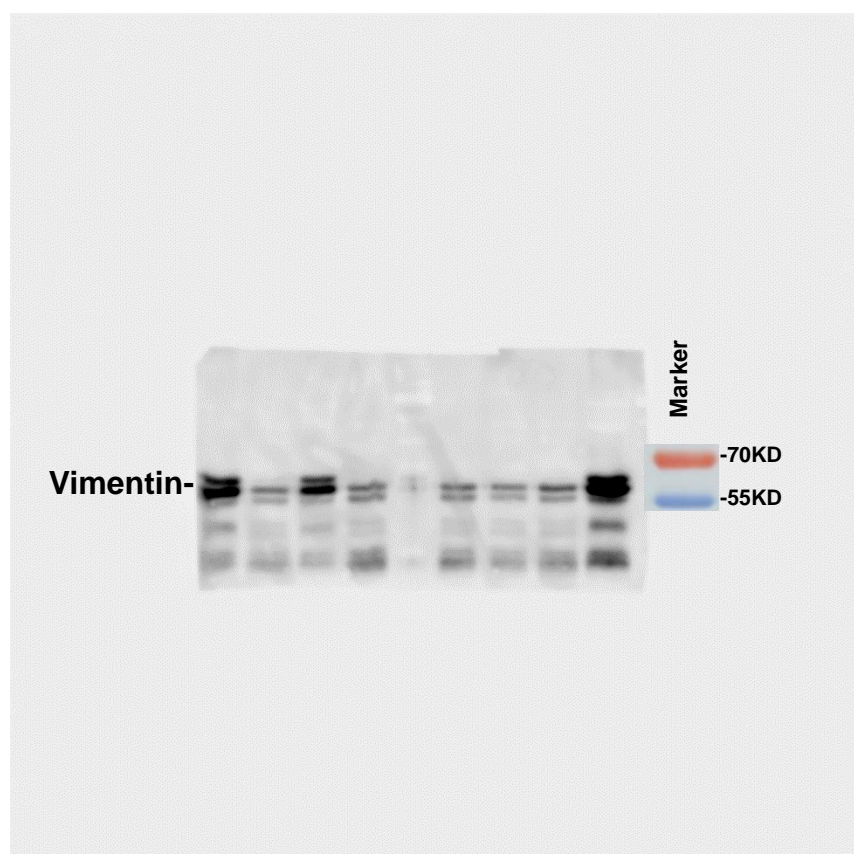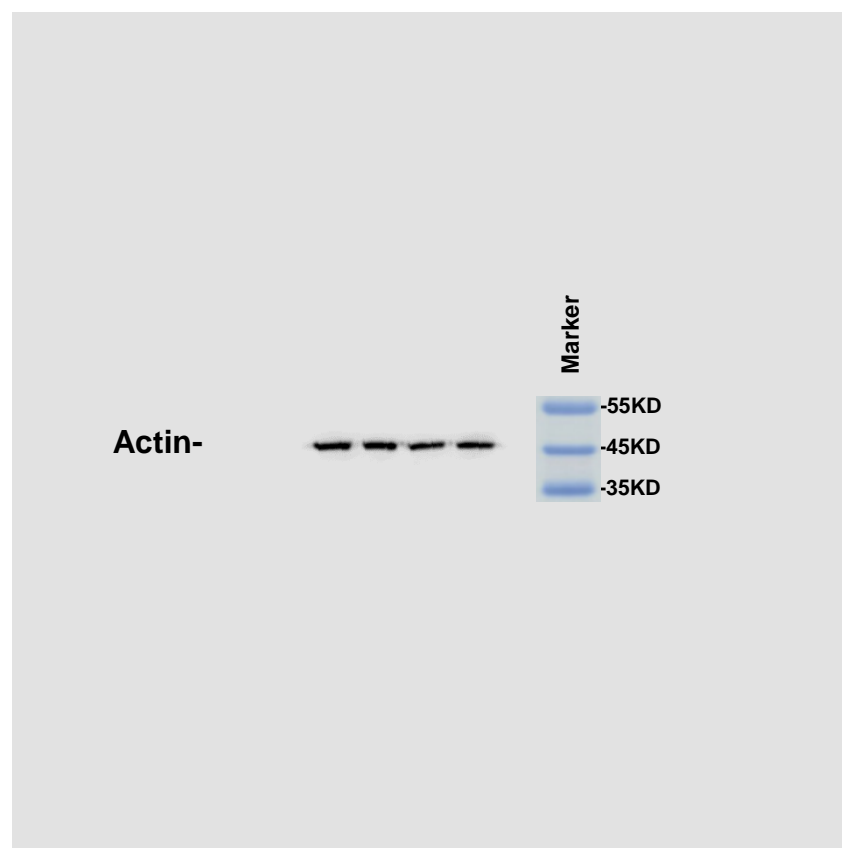

# Figure 4C

Protein marker (#26616, Thermo)

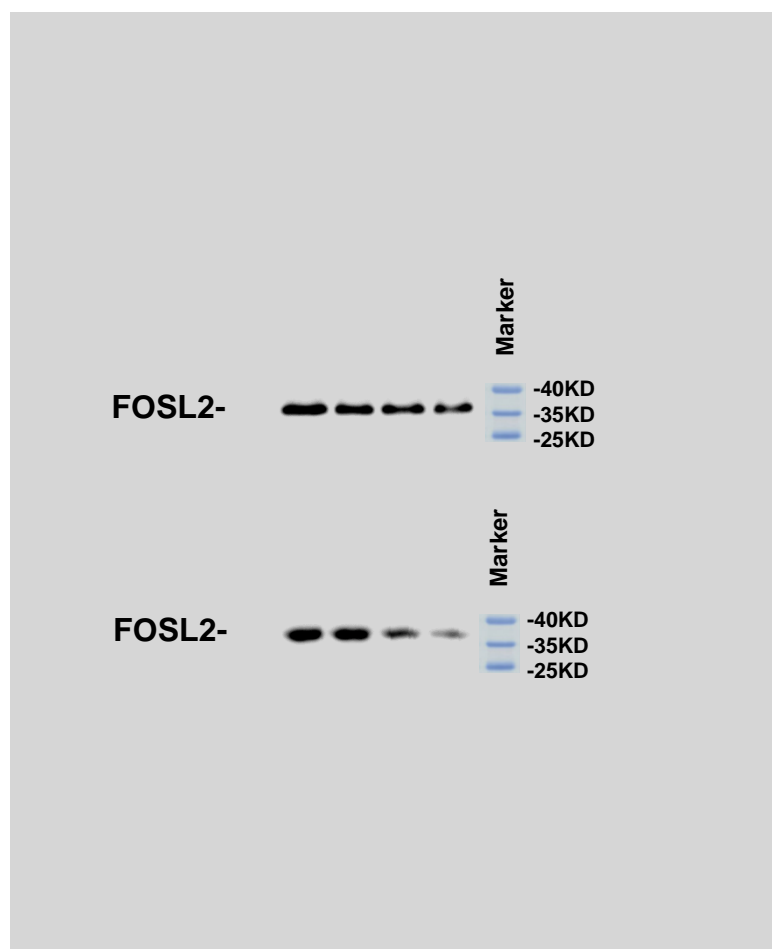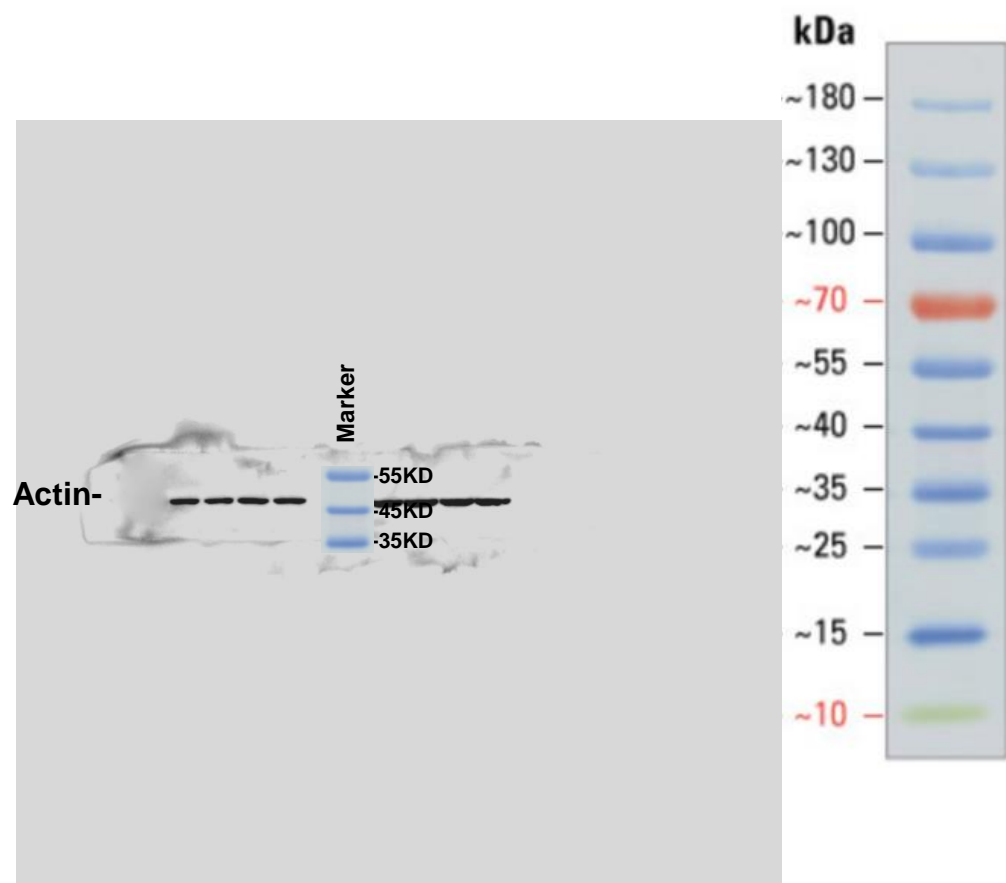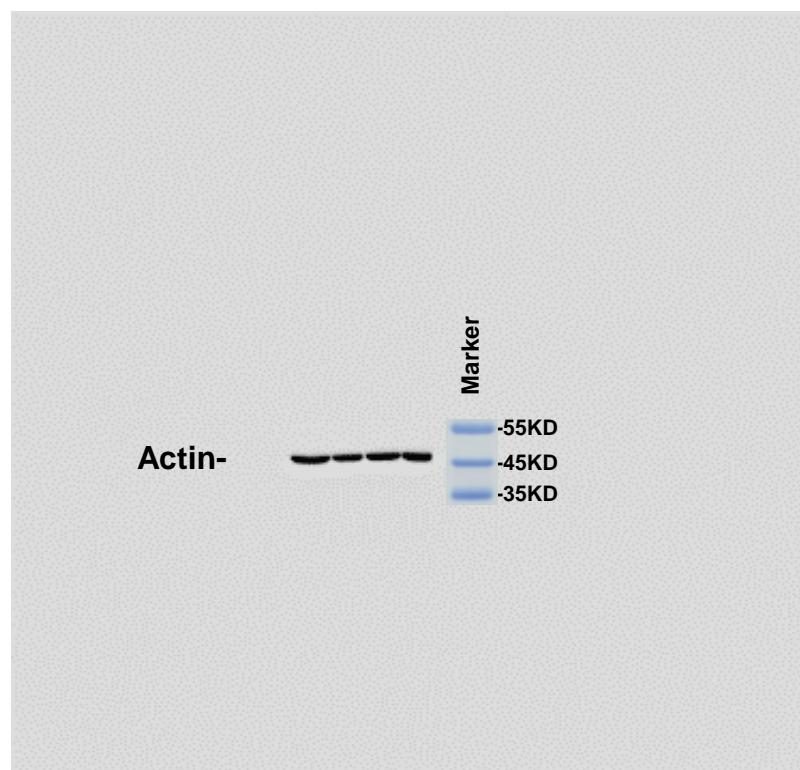

# Figure 4F

Protein marker (#26616, Thermo)

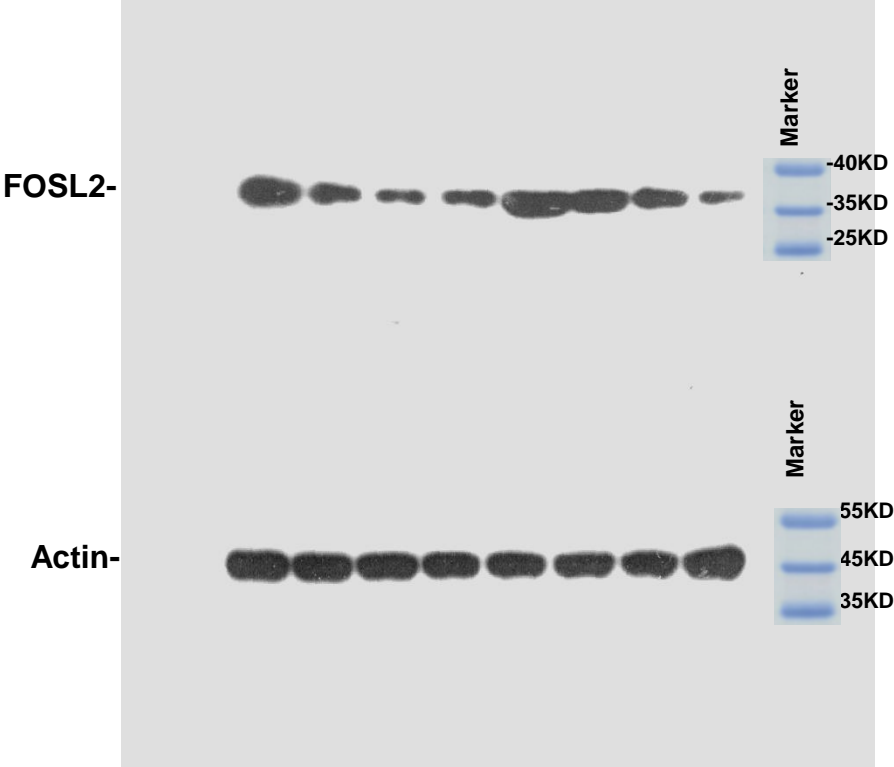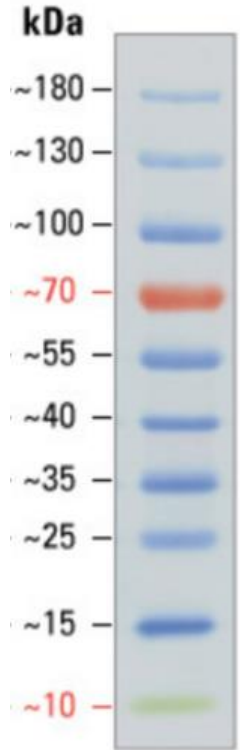

# Figure 4H

Protein marker (#26616, Thermo)

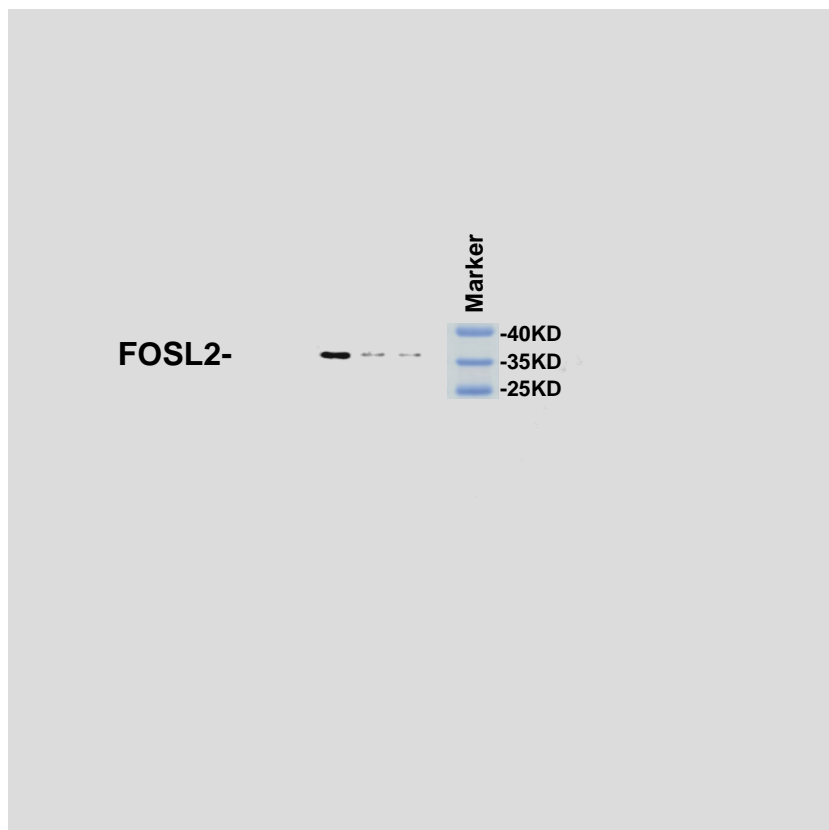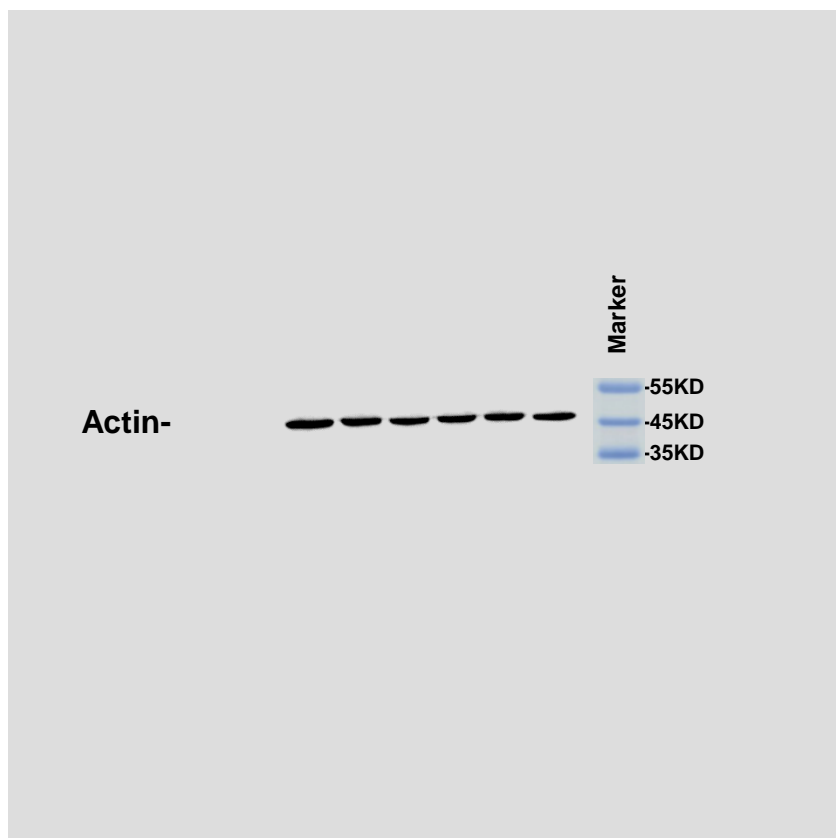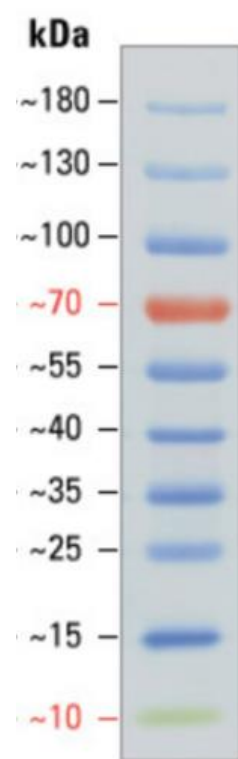

# Figure 4I

Protein marker (#26616, Thermo)

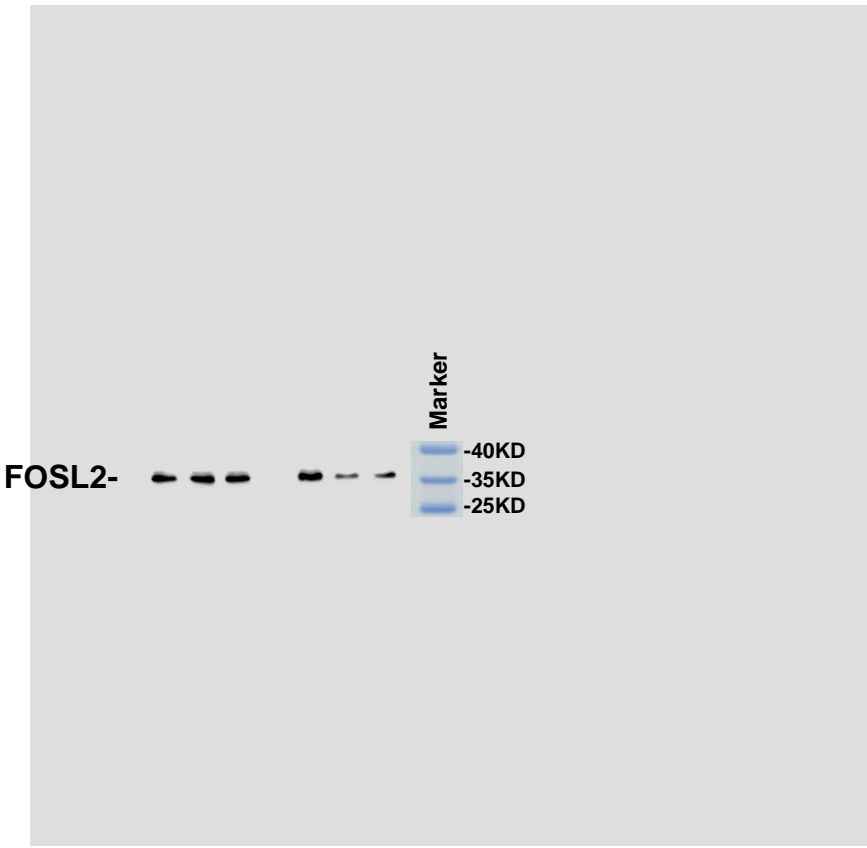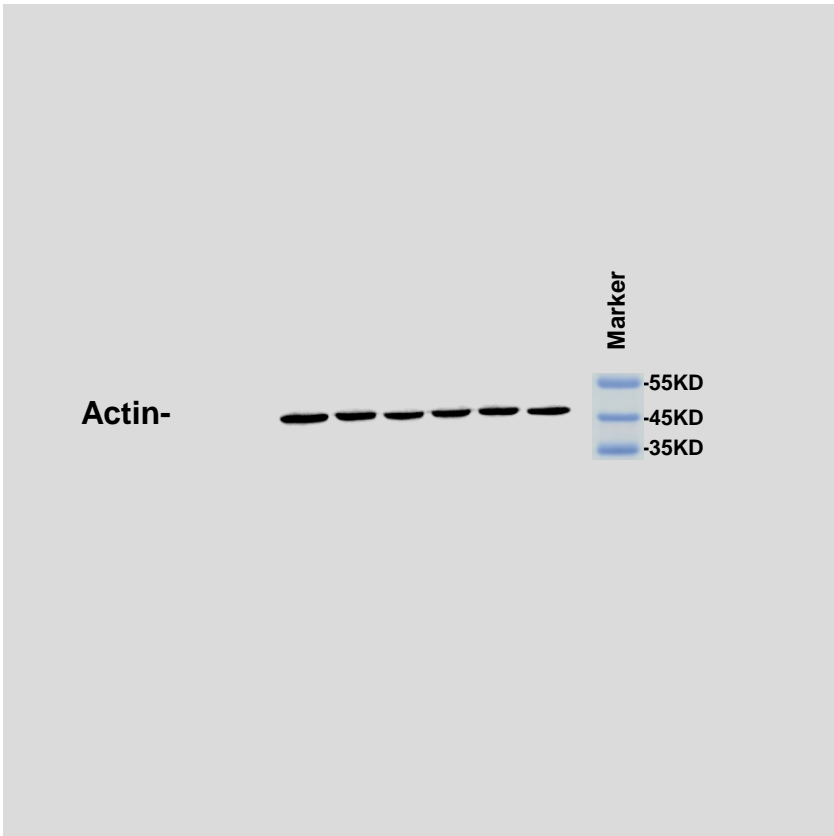

# Figure 4K

Protein marker (#26616, Thermo)

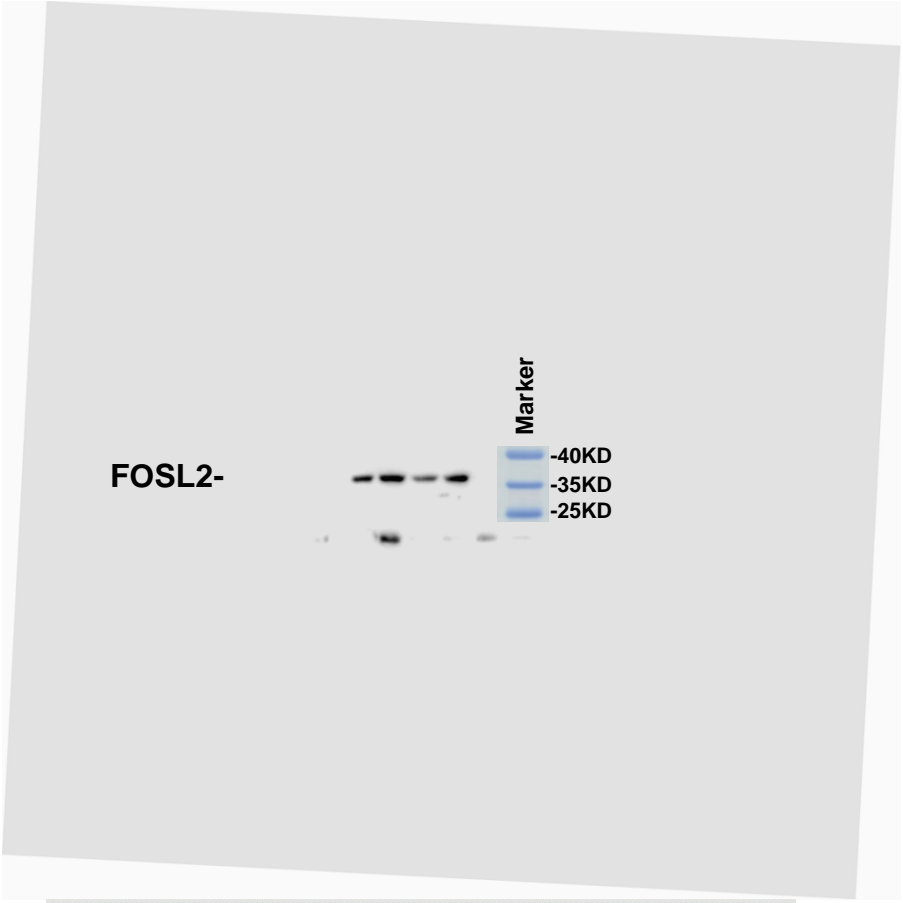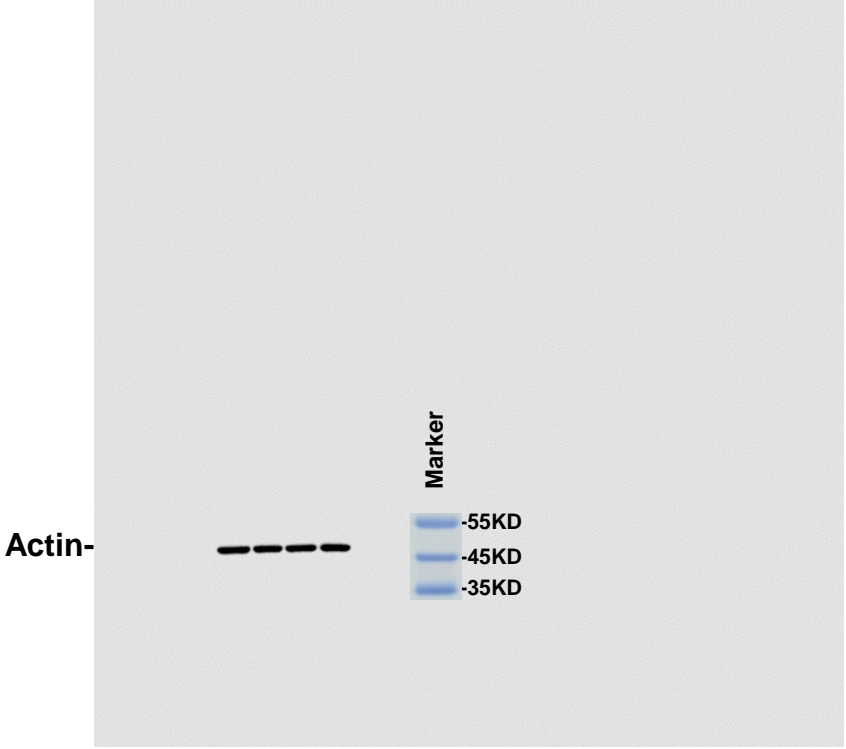

# Figure 4L

Protein marker (#26616, Thermo)

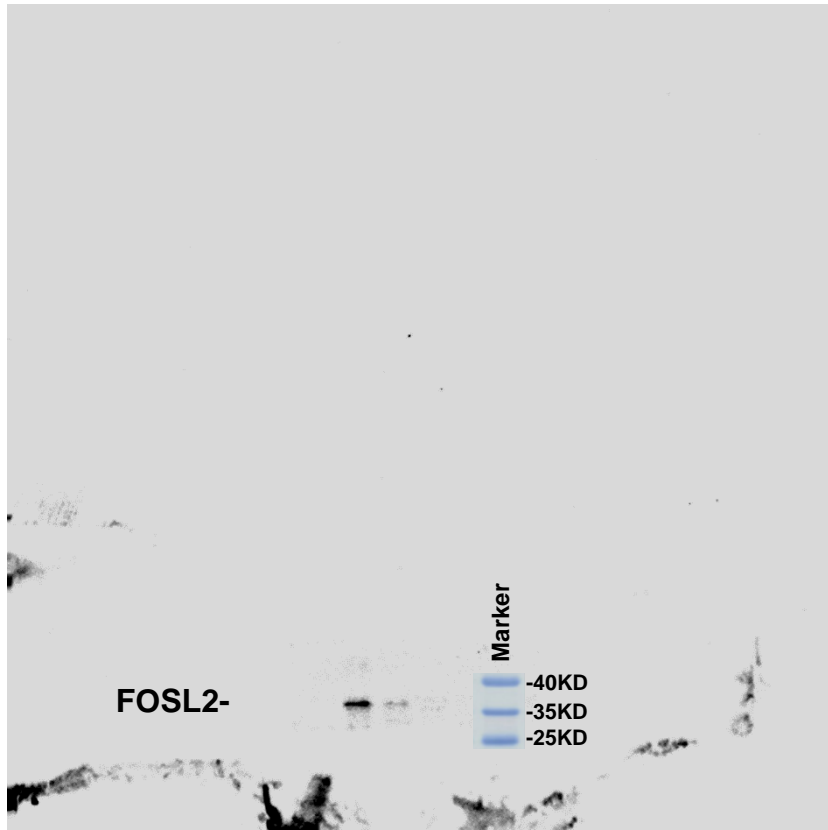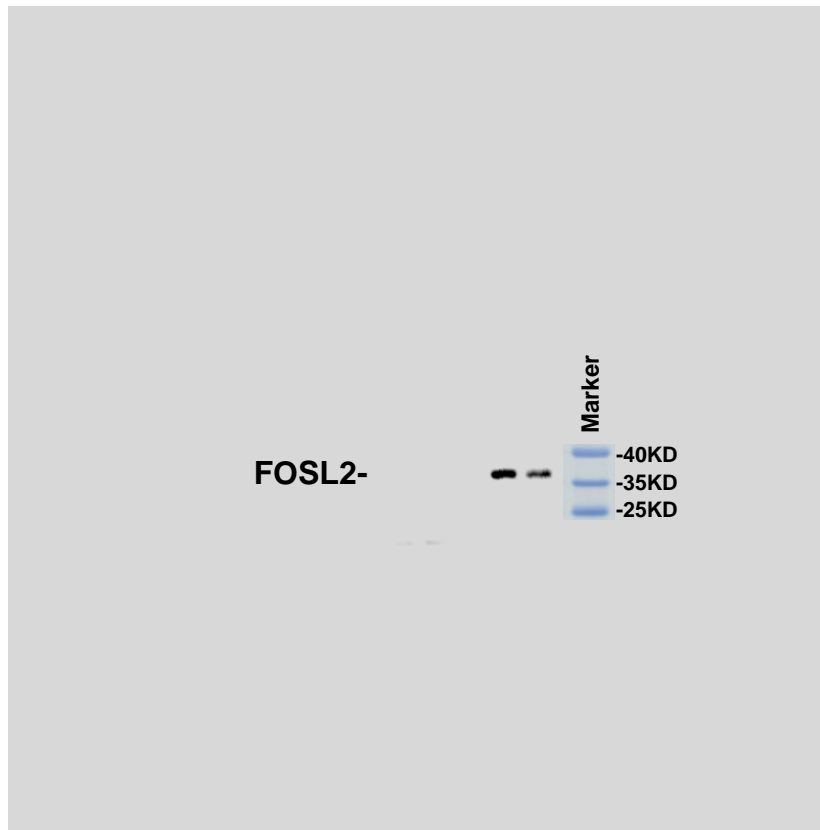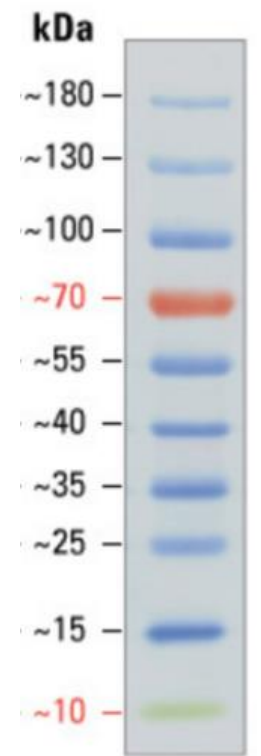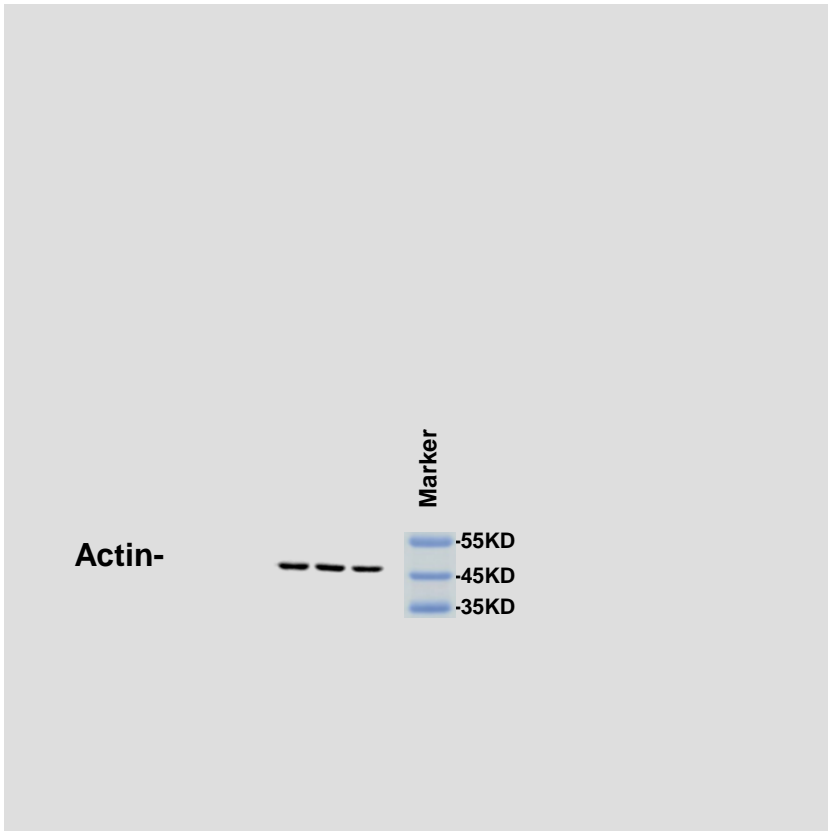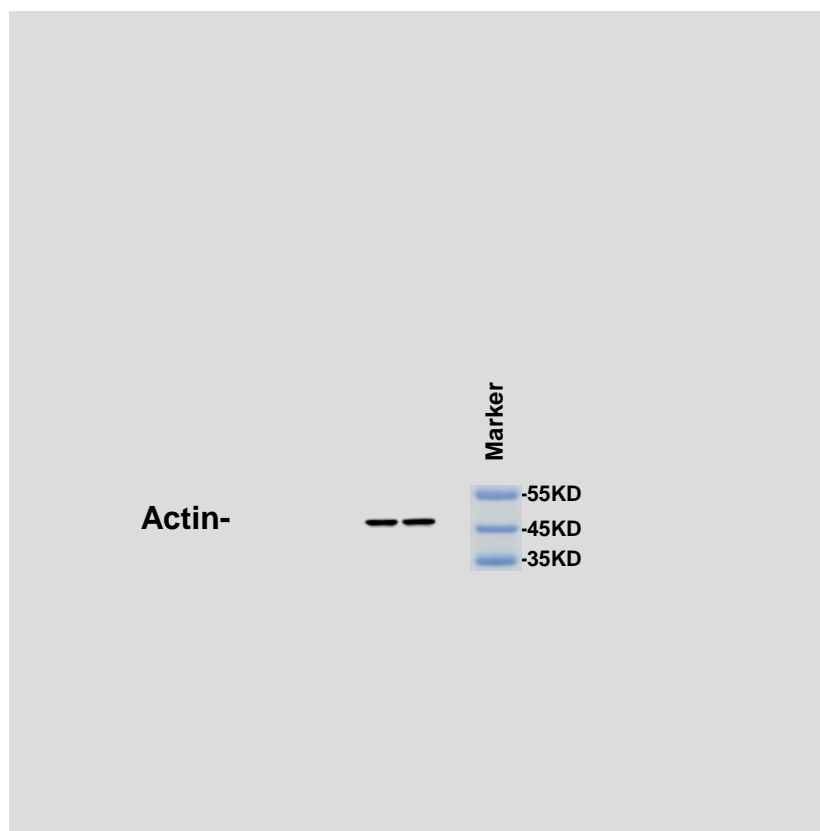



# Figure 4L

Protein marker (#26616, Thermo)

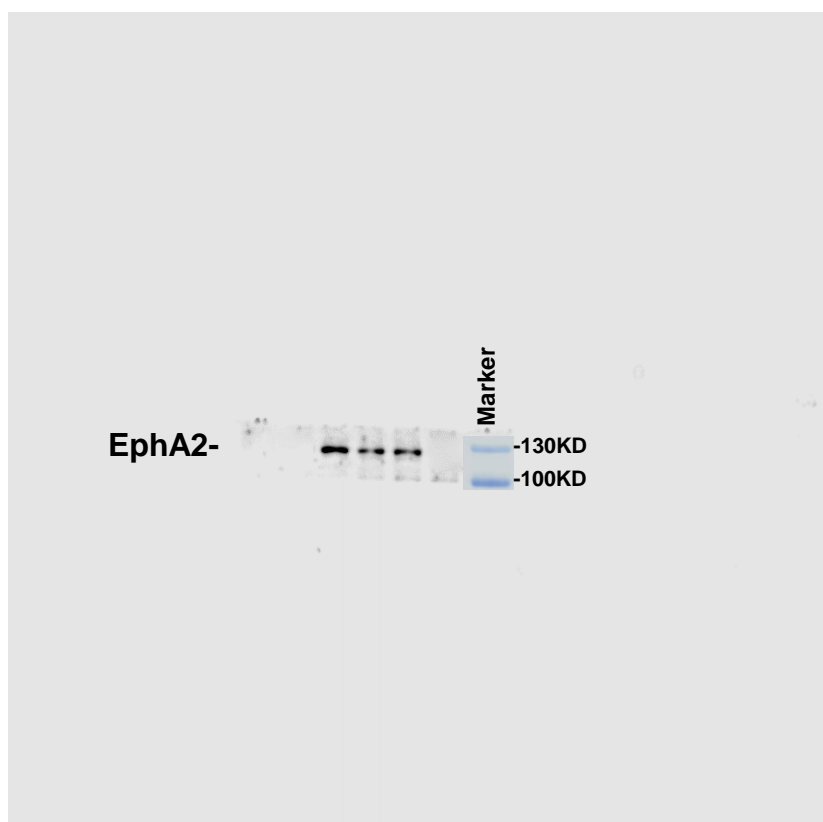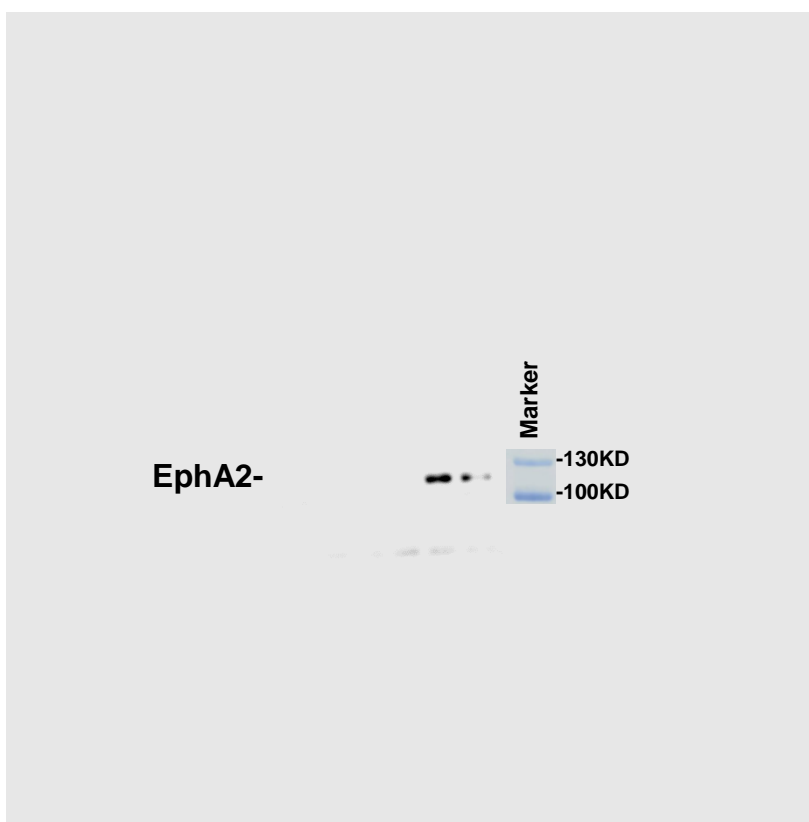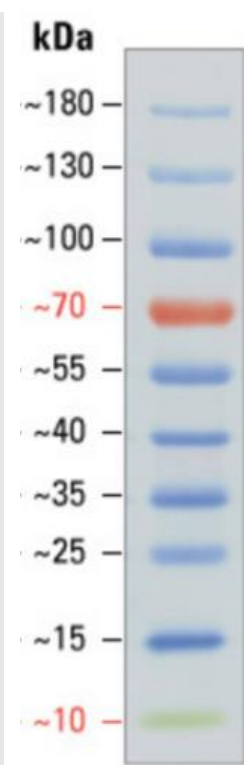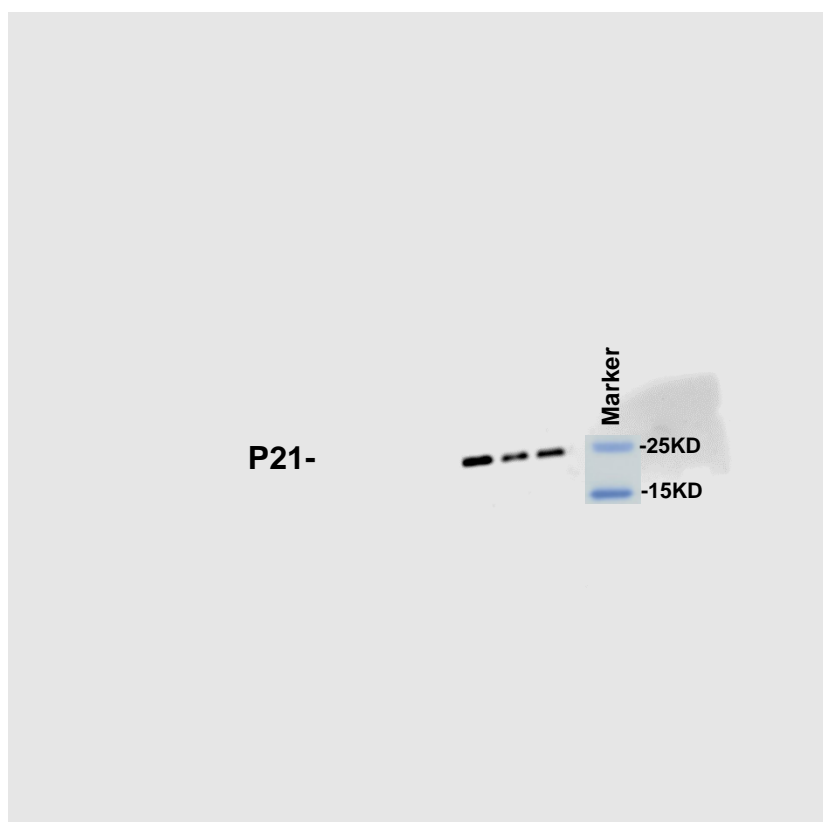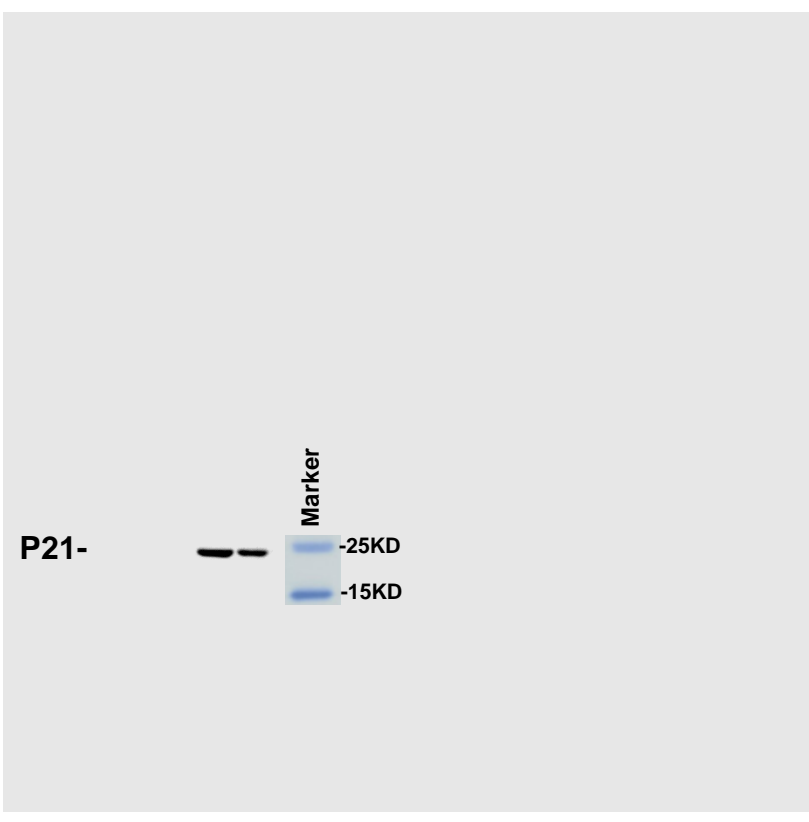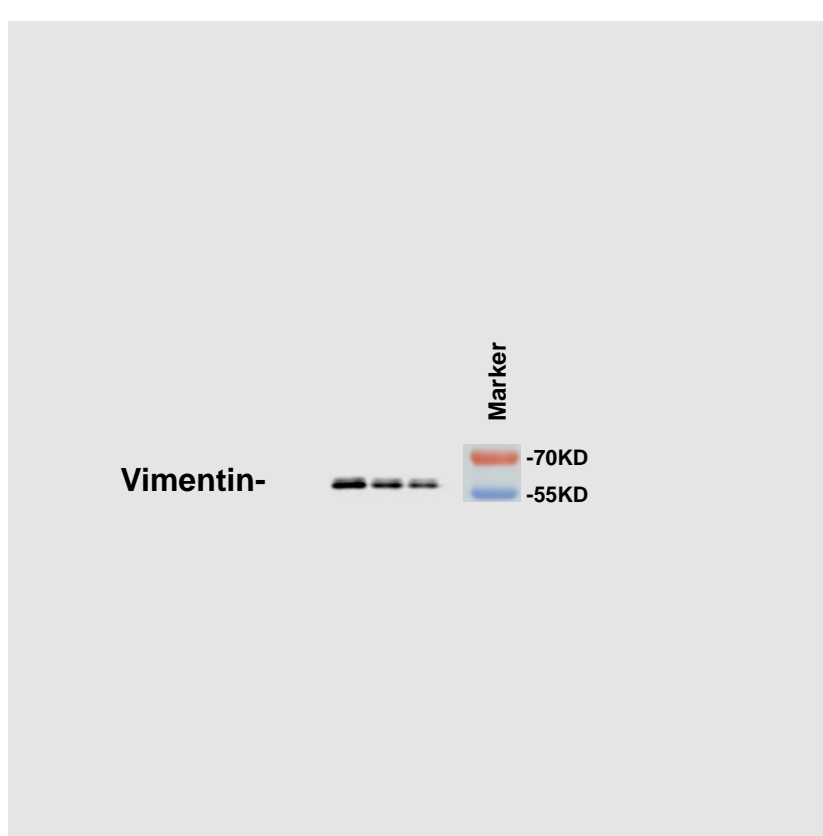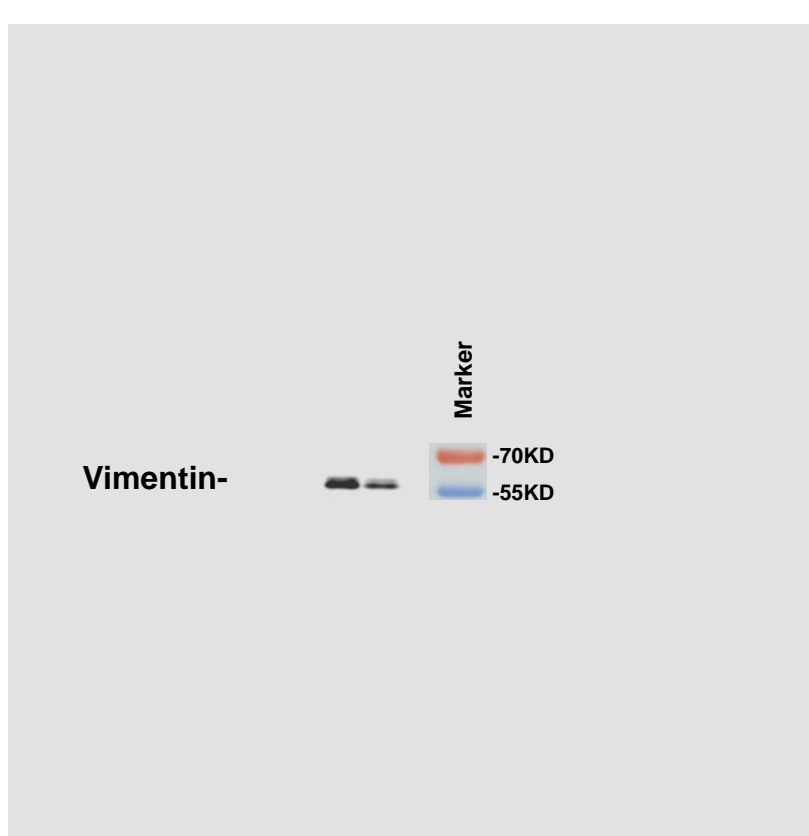

# Figure 5D

Protein marker (#26616, Thermo)

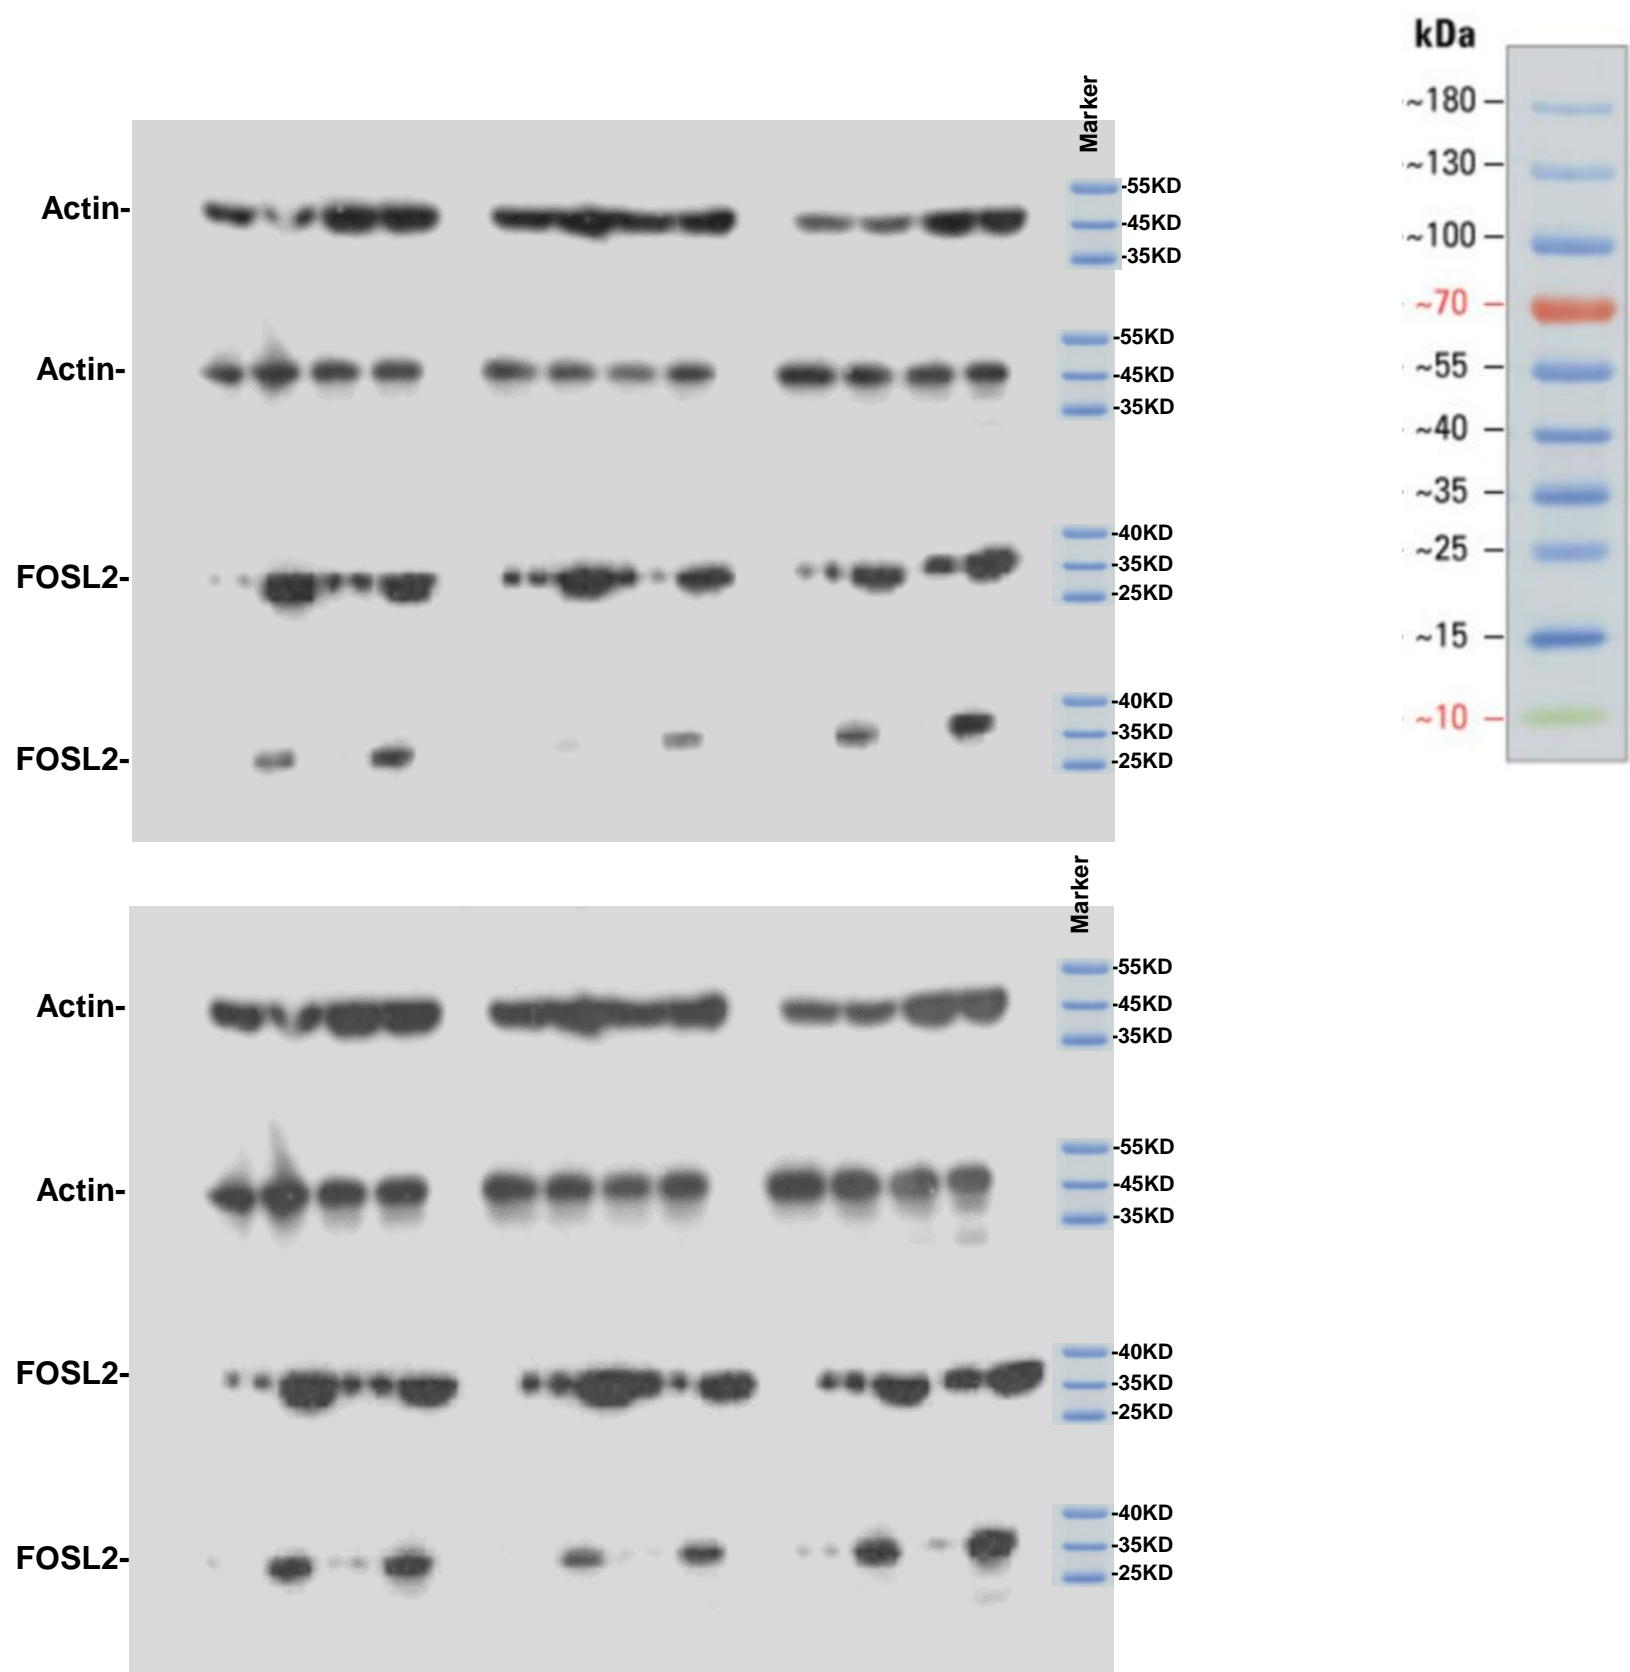

# Figure 5F

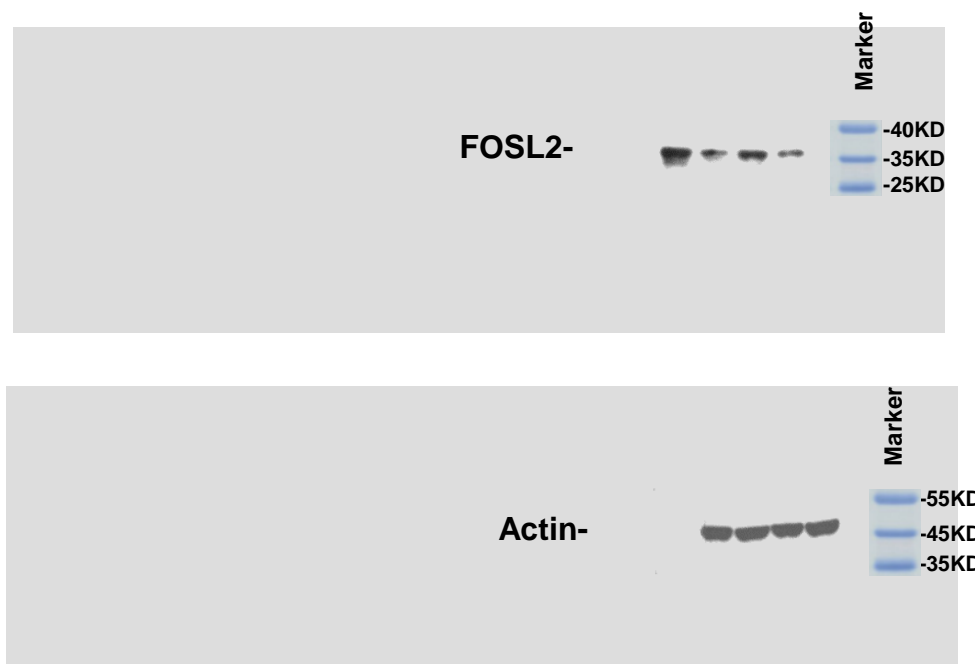

Figure 7A

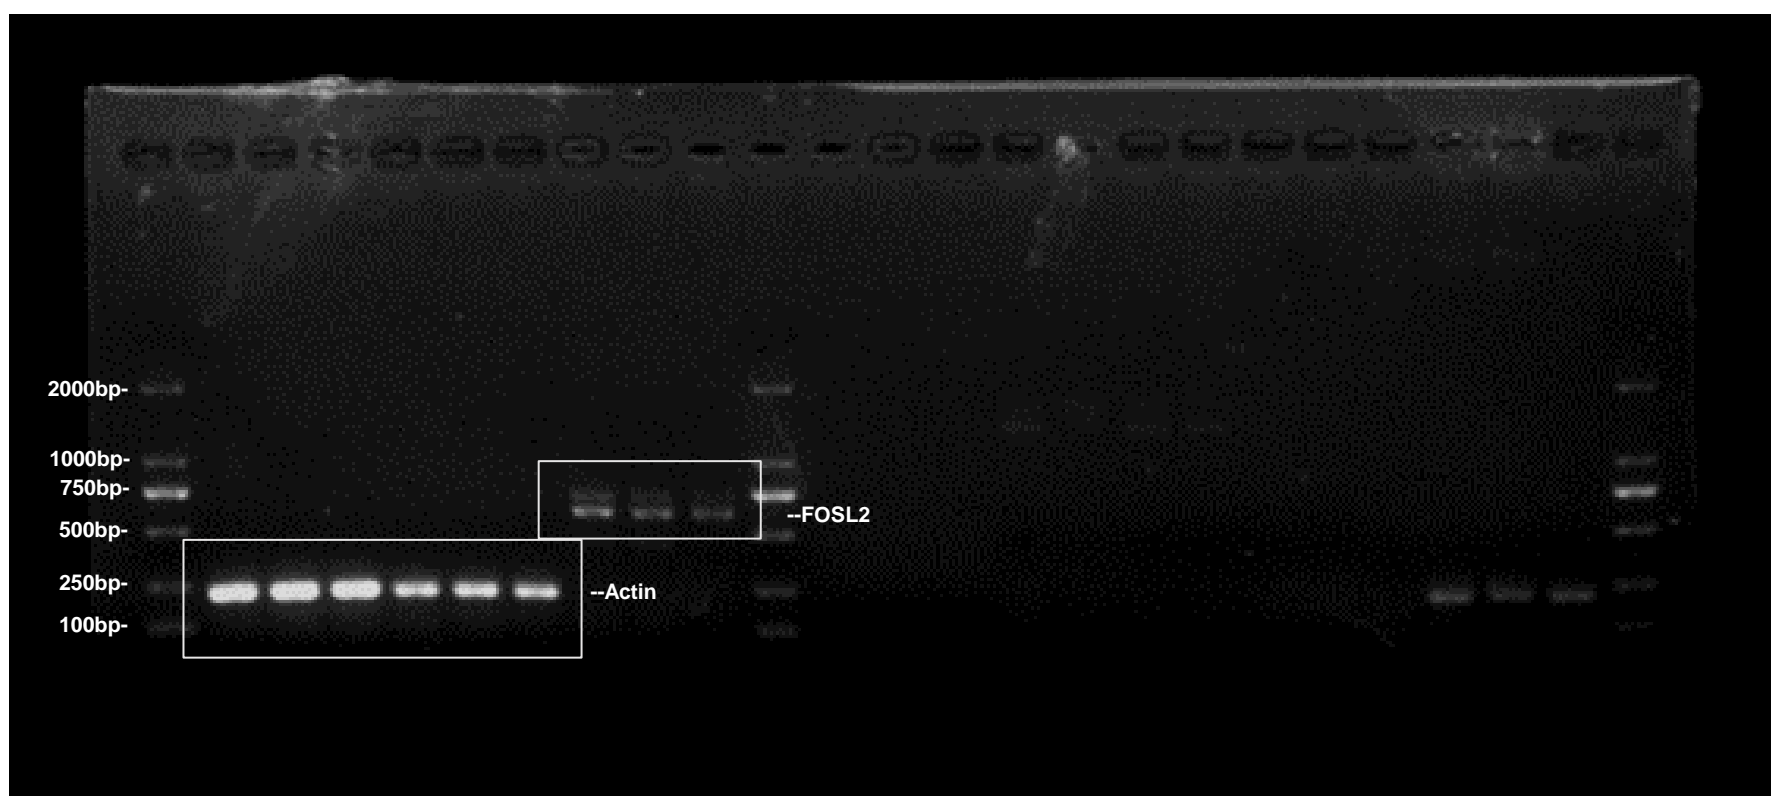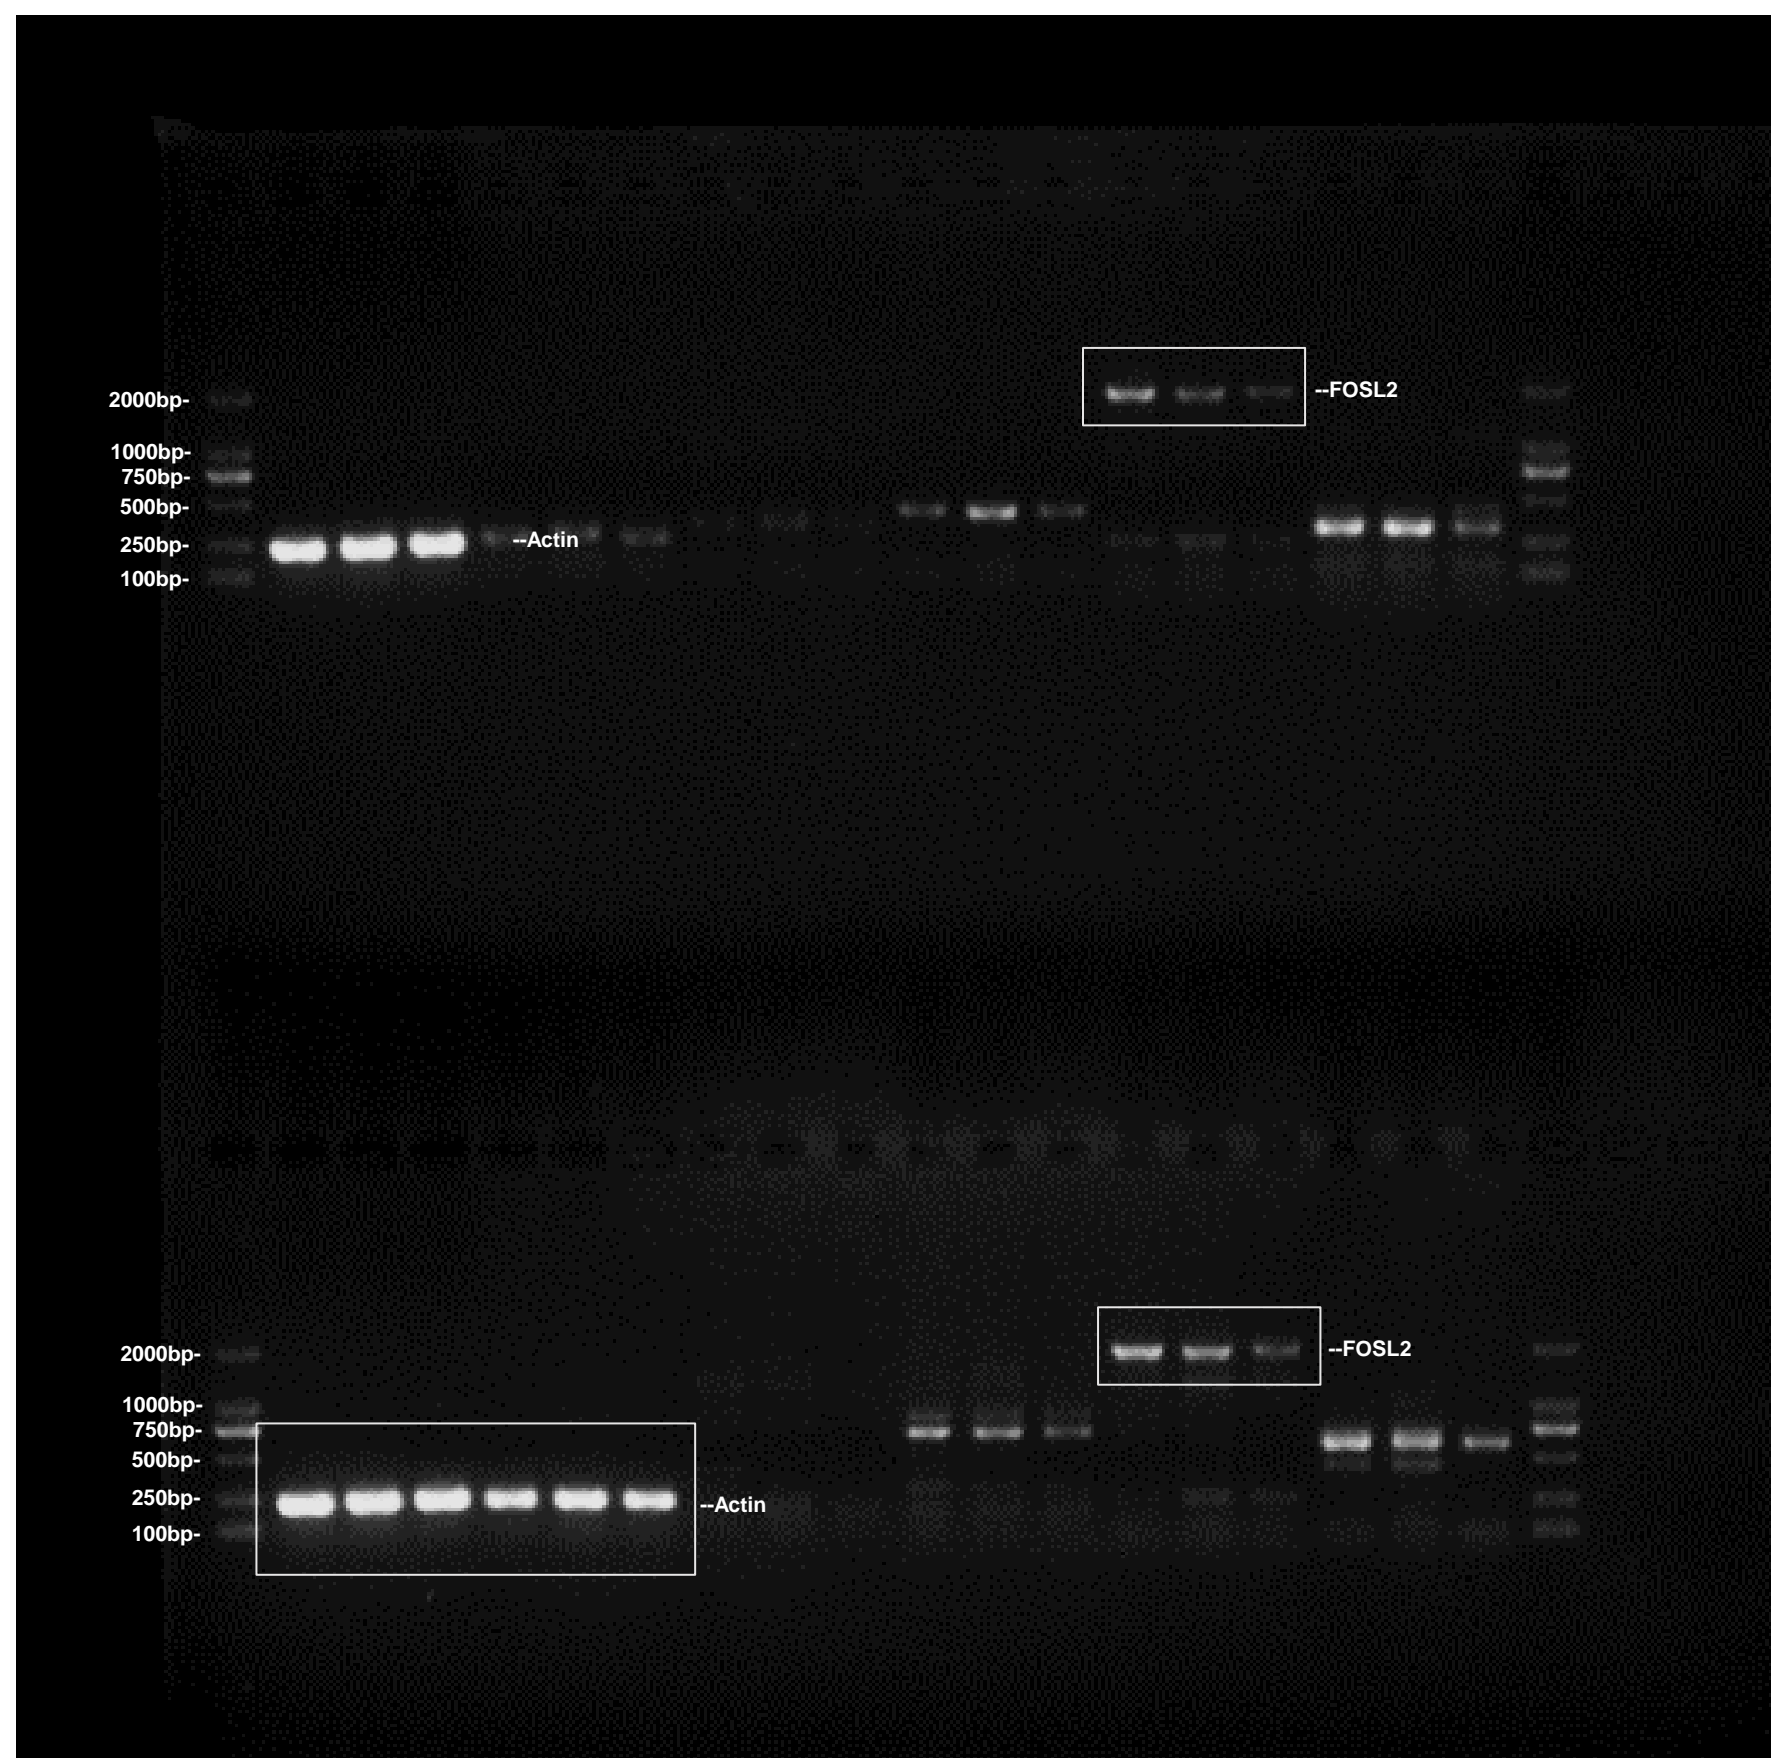

**Figure 7D**

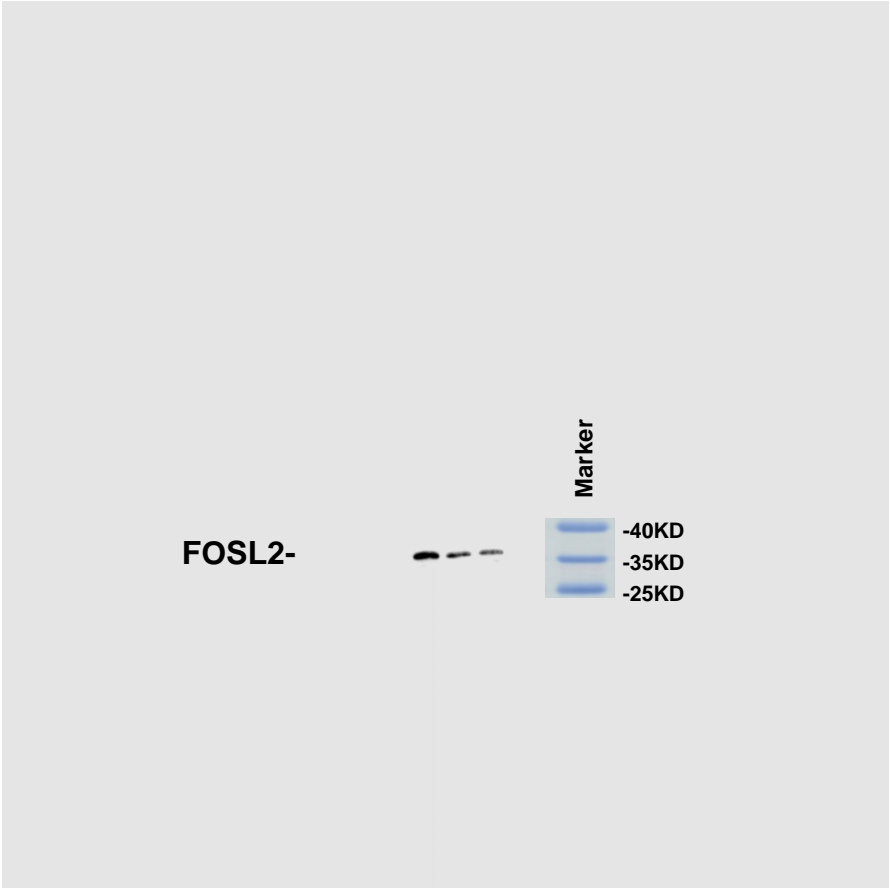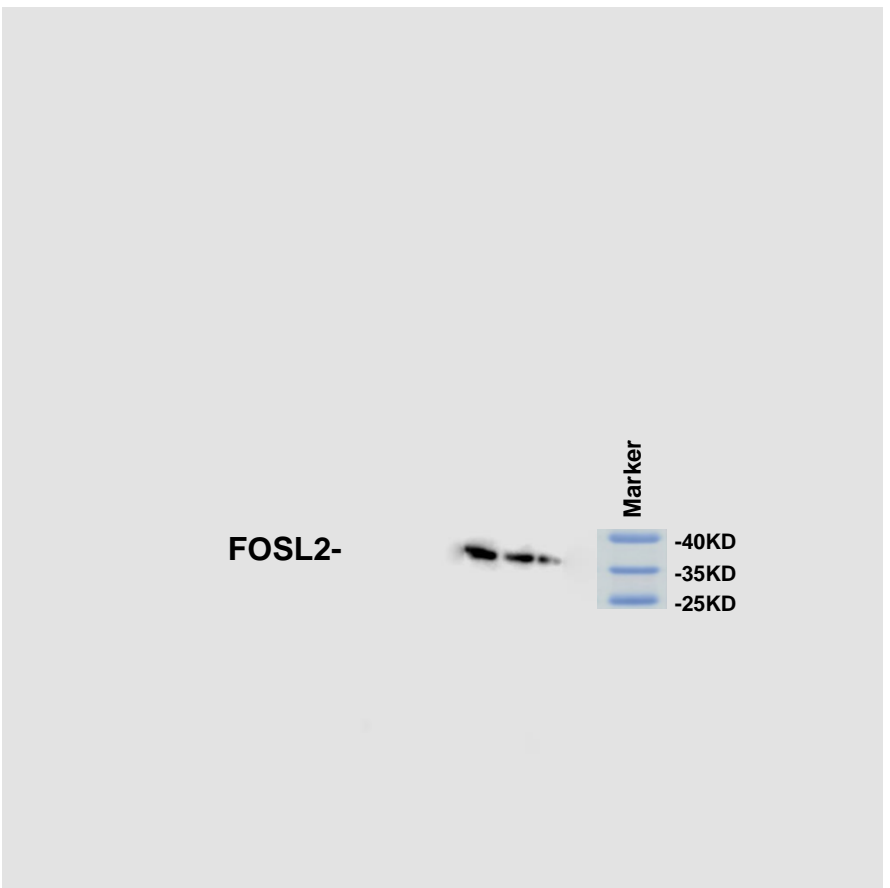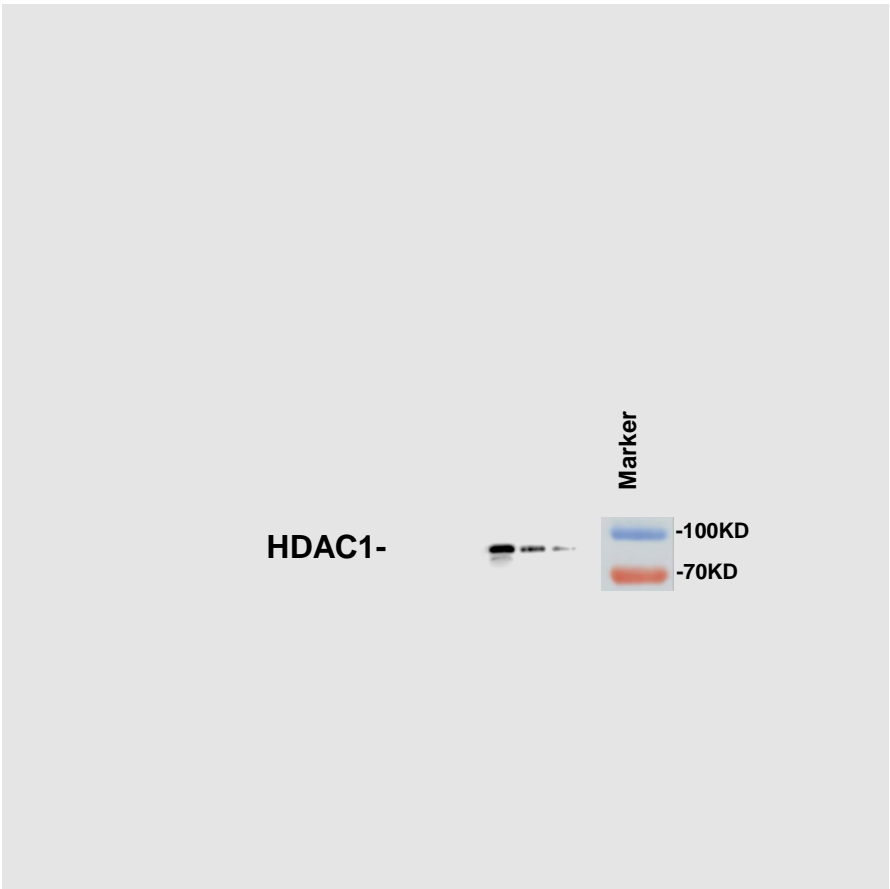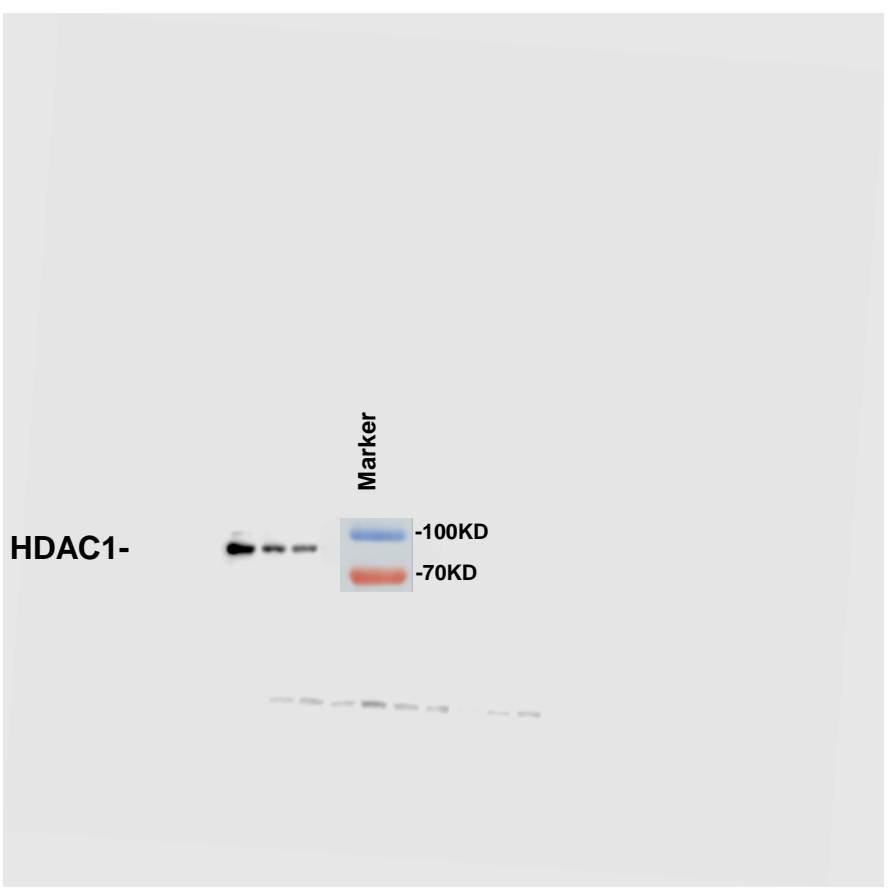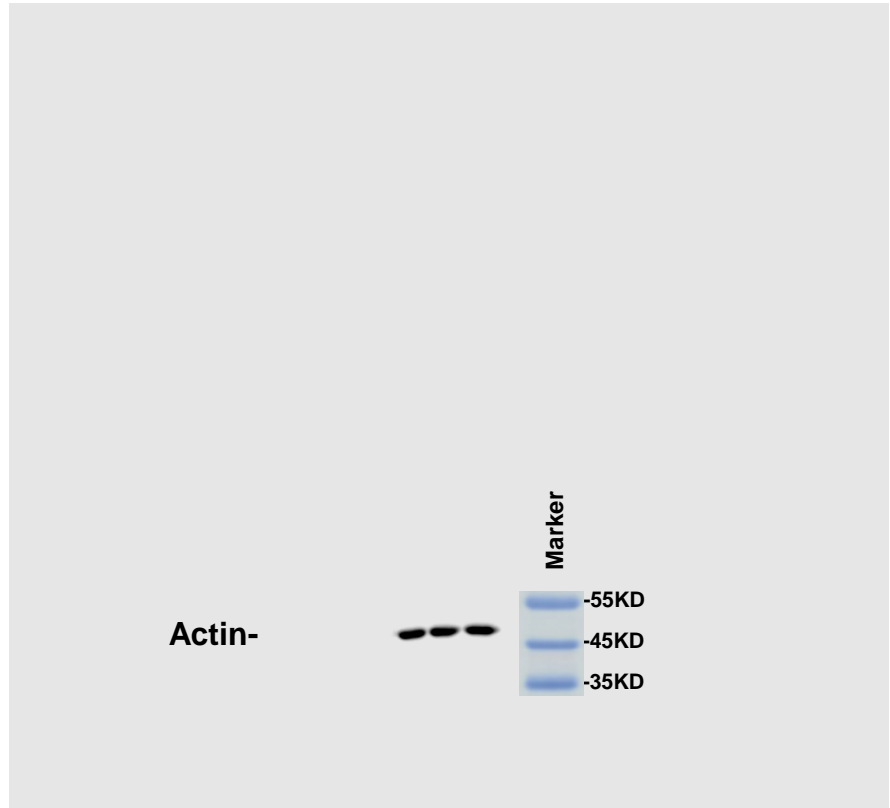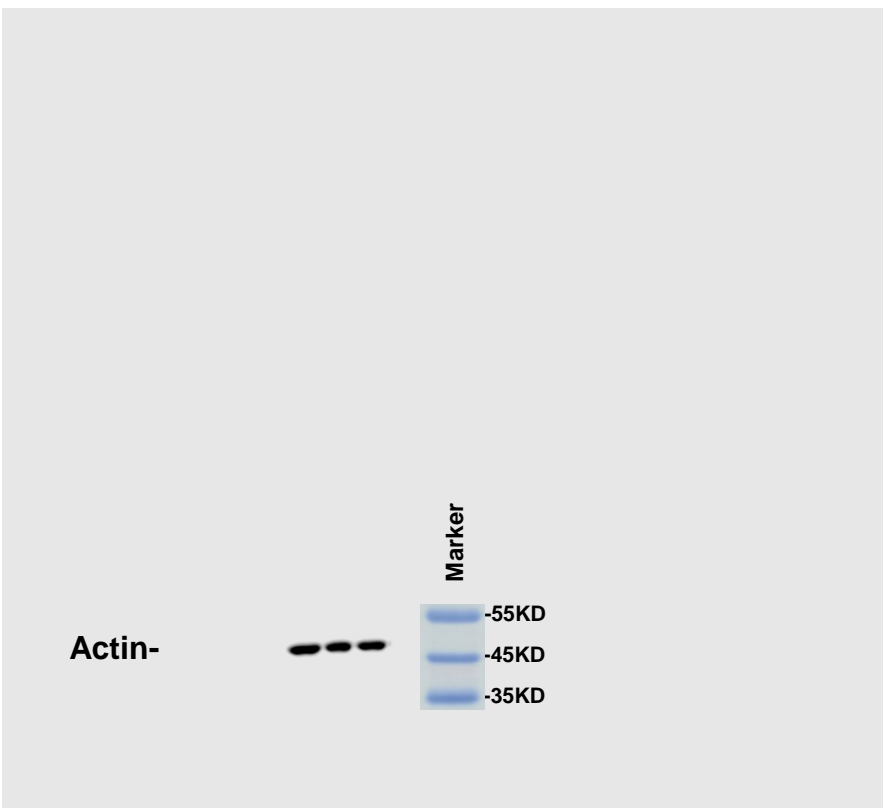

# Figure 7F

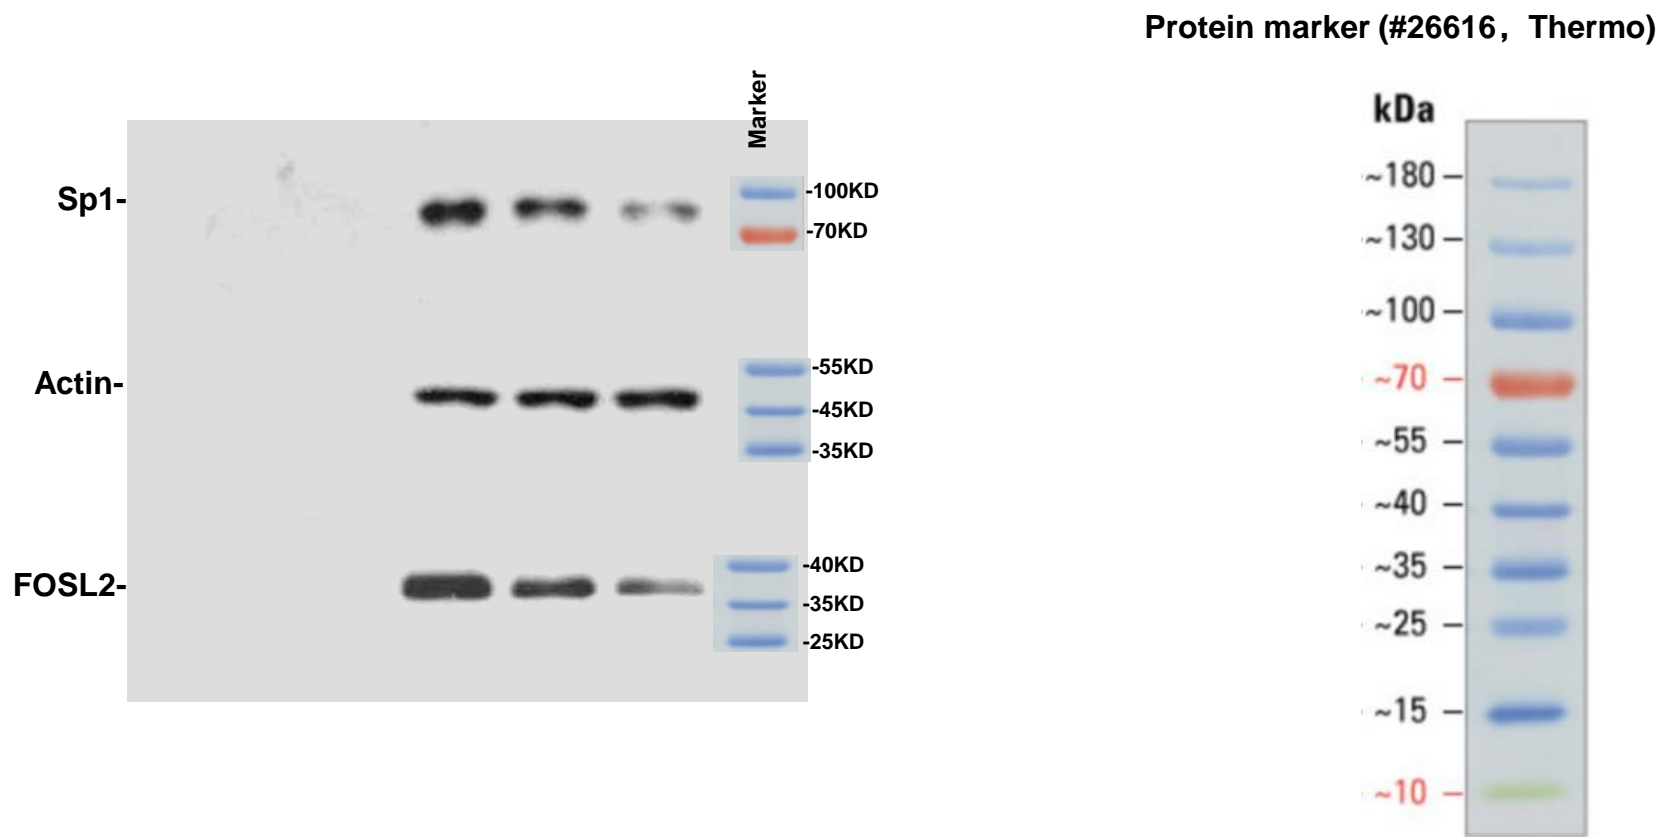

# Figure 7J

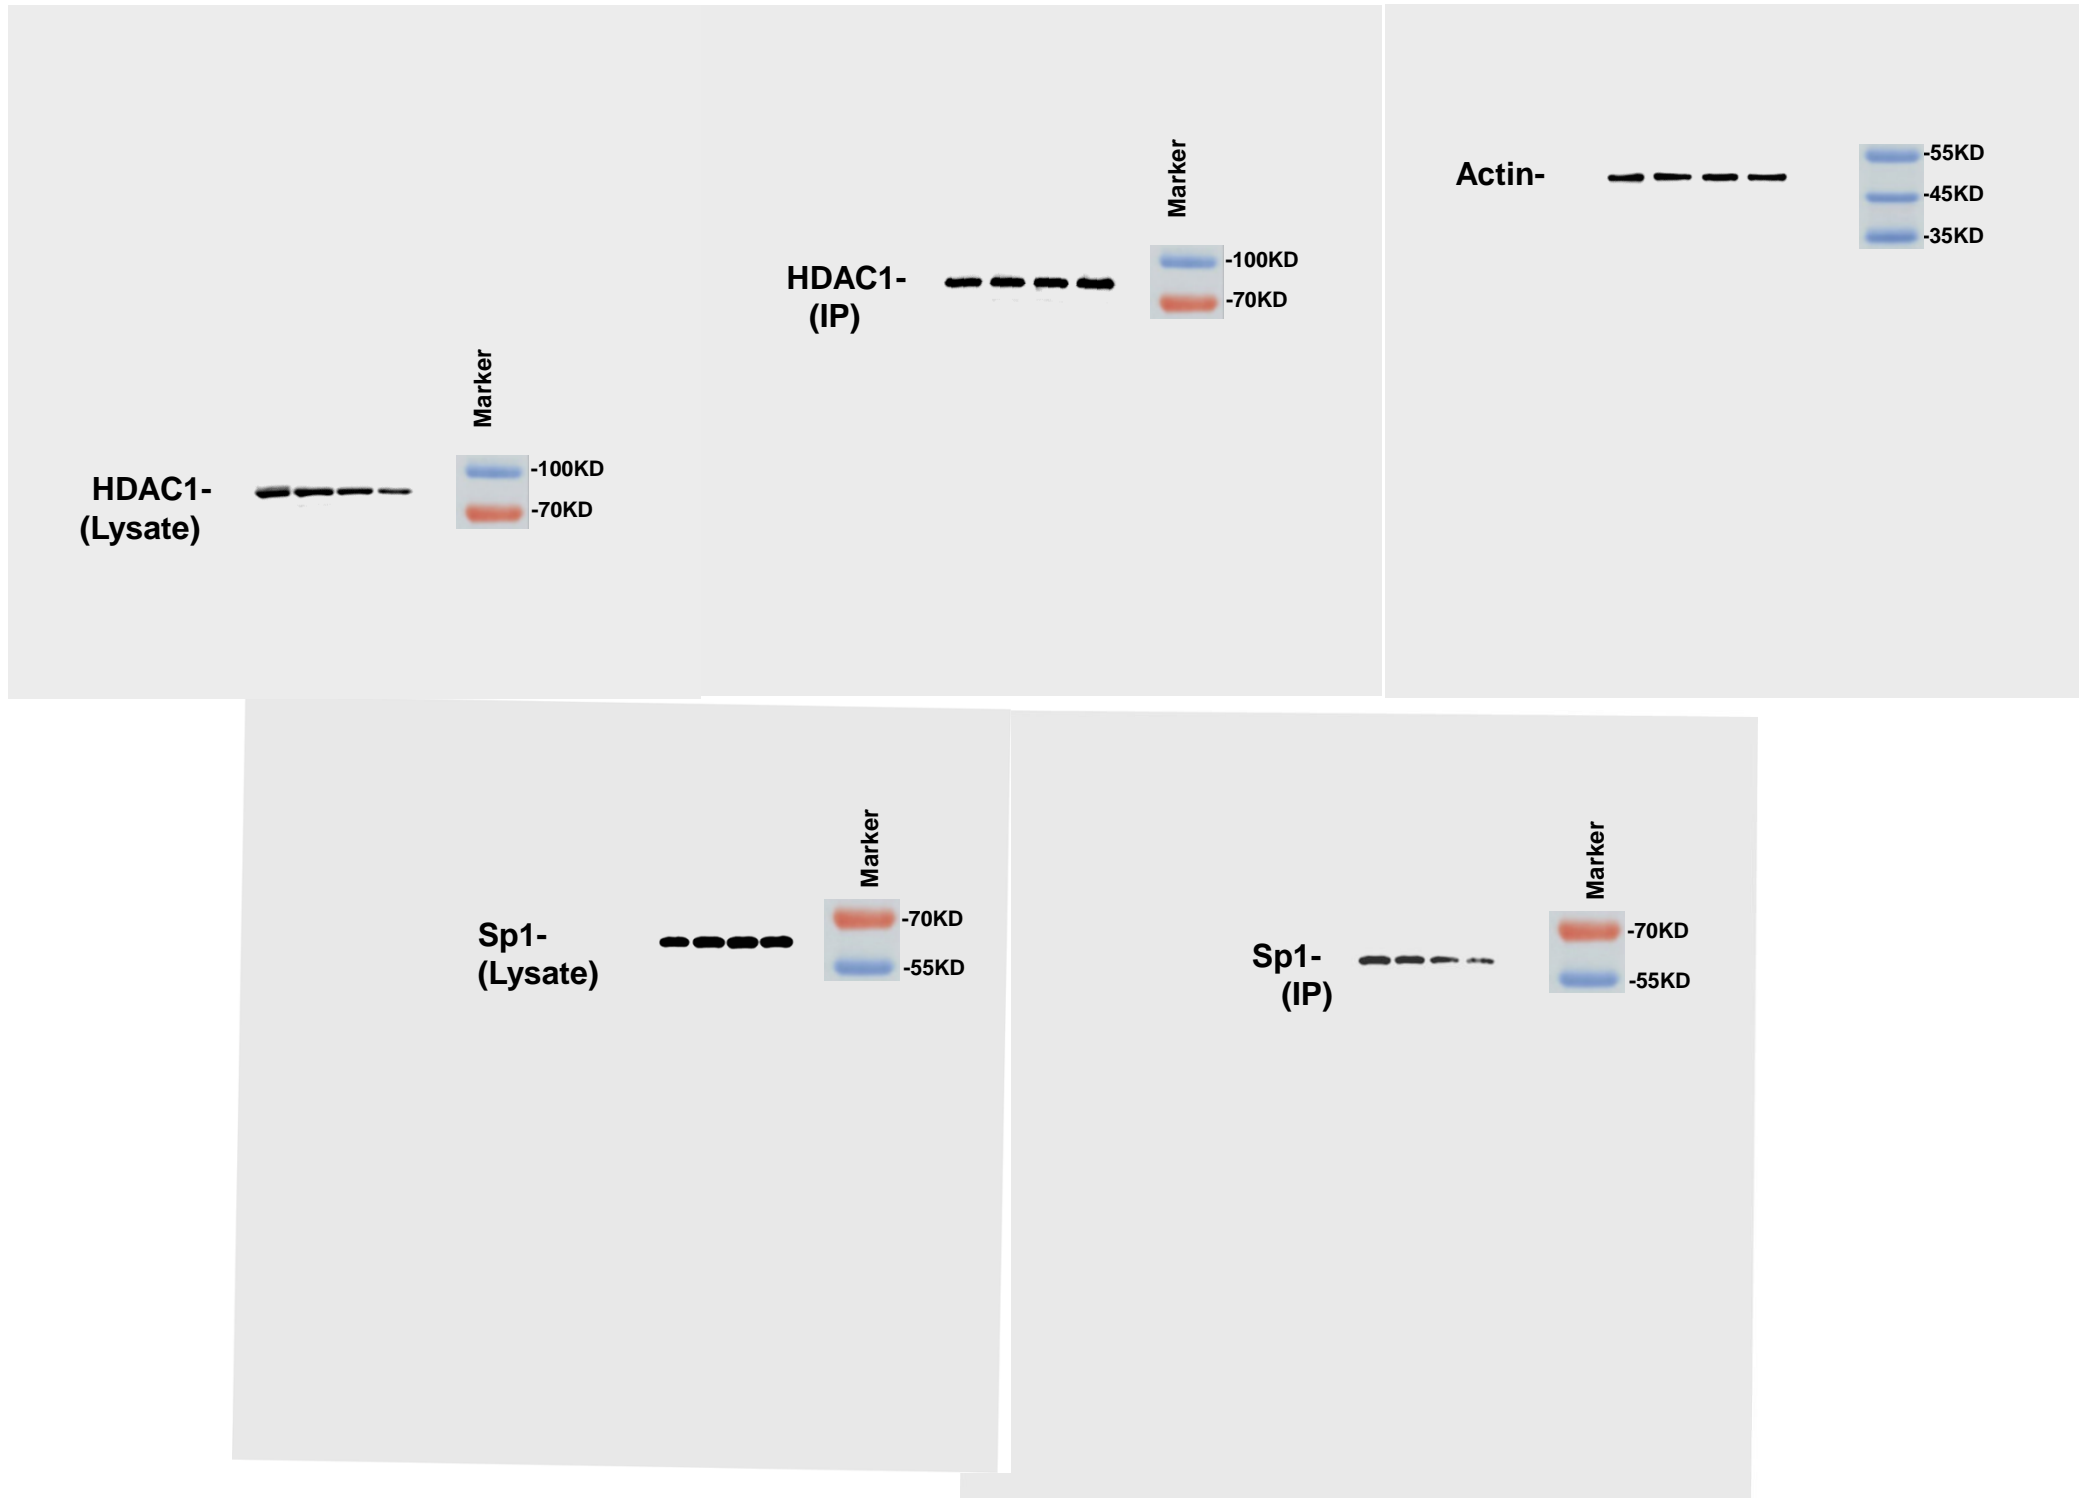

# Figure 7M

Protein marker (#26616, Thermo)

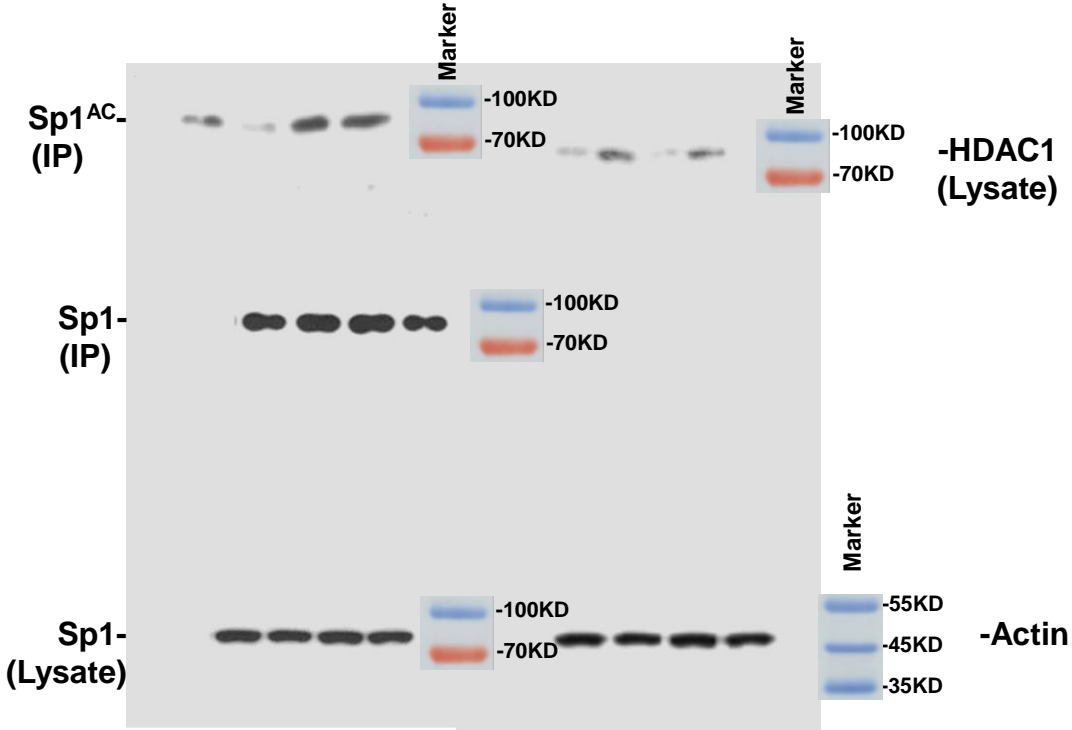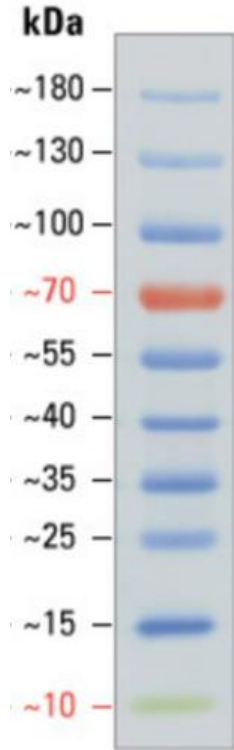

# Figure 70

Protein marker (#26616, Thermo)

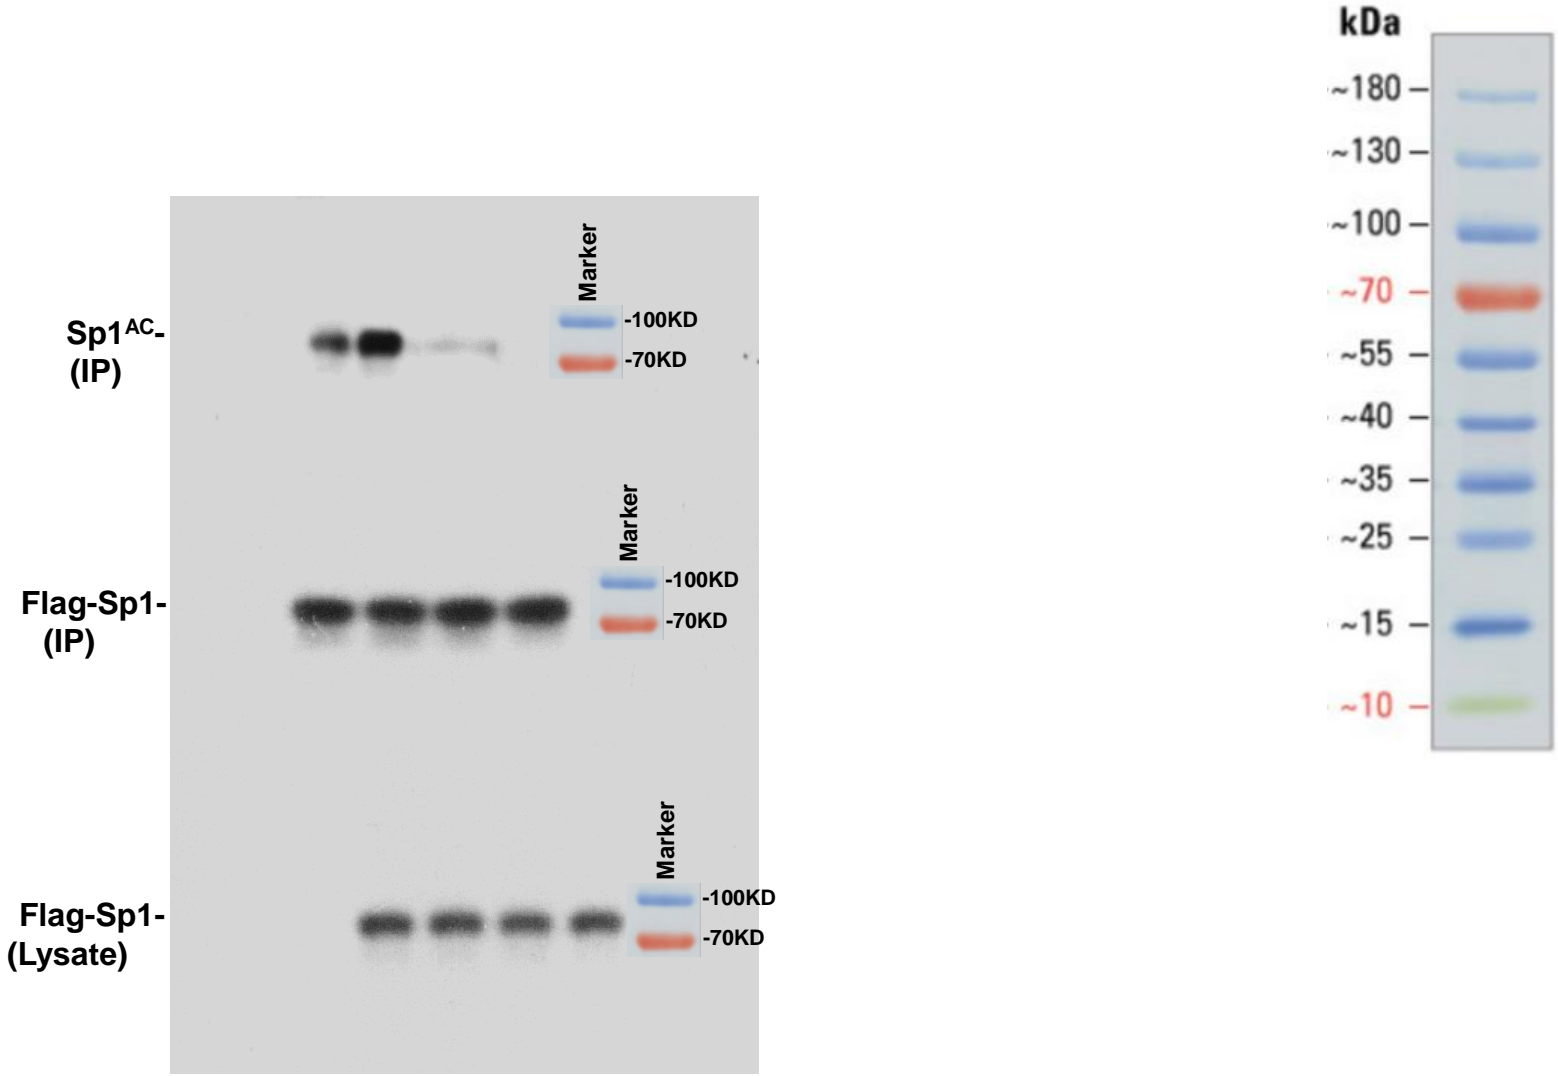



# Figure 7Q

Protein marker (#26616, Thermo)

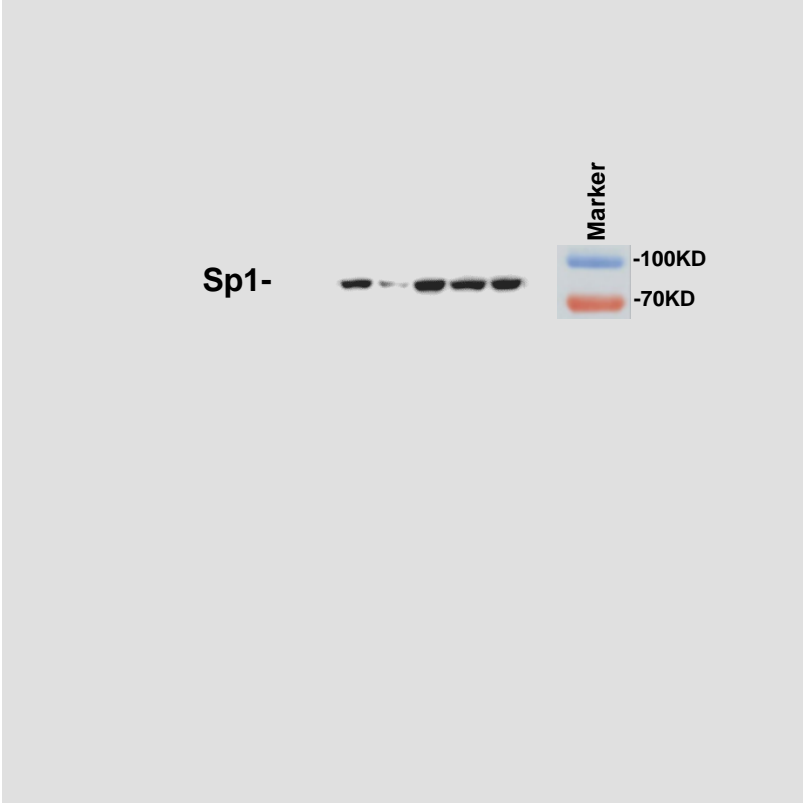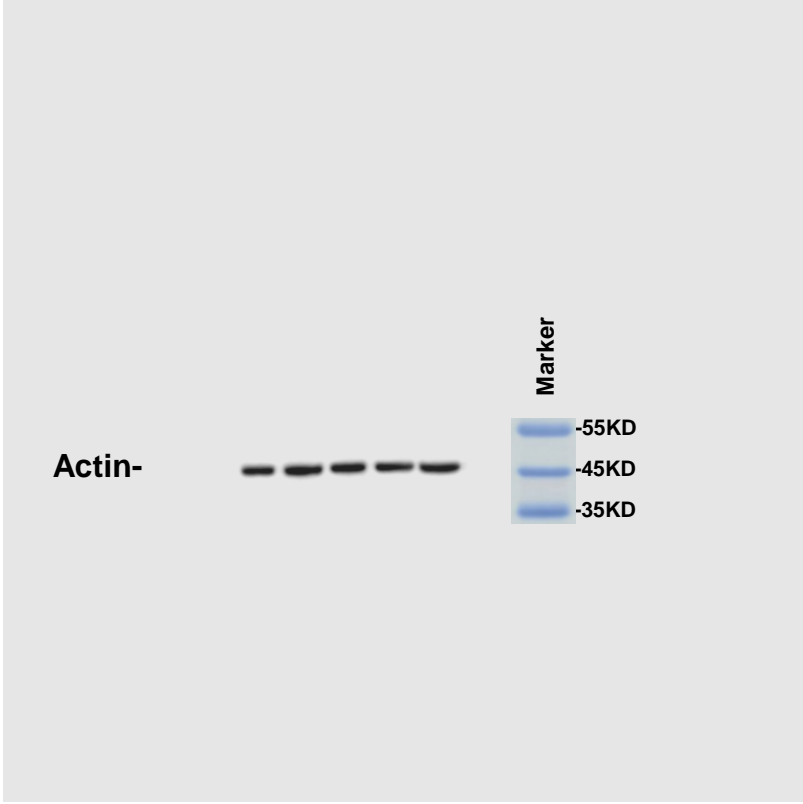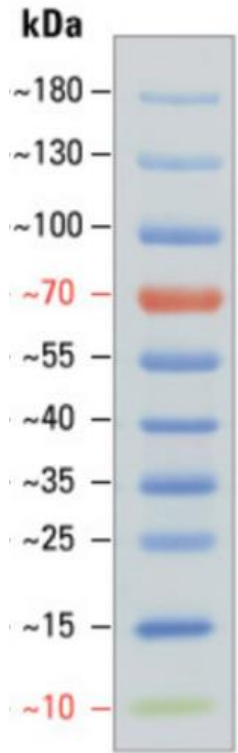

Supplement: 12964_2024_1733_MOESM2_ESM.pdf [file 12964_2024_1733_MOESM2_ESM.pdf]
